# Supplementary material for: Archaeal chromatin ‘slinkies’ are inherently dynamic complexes with deflected DNA wrapping pathways
Source: eLife. 2021 Mar 2;10:e65587. doi: 10.7554/eLife.65587 (PMC7990501; doi:10.7554/eLife.65587)
Supplement: Figure 2—figure supplement 1—source data 1. [file elife-65587-fig2-figsupp1-data1.csv]

Arc90						Arc120						Arc120-G17D						Arc180
Replica1		Replica2		Replica3		Replica1		Replica2		Replica3		Replica1		Replica2		Replica3		Replica1		Replica2		Replica3
Residue	RMSF	Residue	RMSF	Residue	RMSF	Residue	RMSF	Residue	RMSF	Residue	RMSF	Residue	RMSF	Residue	RMSF	Residue	RMSF	Residue	RMSF	Residue	RMSF	Residue	RMSF
1	7.1215	1	5.1171	1	4.6588	1	4.5772	1	4.8002	1	4.764	1	7.1668	1	5.5726	1	4.9625	1	1.2829	1	1.6083	1	1.4351
2	6.6574	2	4.6781	2	4.2047	2	4.1441	2	4.3129	2	4.3024	2	6.713	2	5.1947	2	4.587	2	1.0744	2	1.3056	2	1.19
3	6.0319	3	4.2228	3	3.8103	3	3.7956	3	3.9739	3	3.8653	3	6.3232	3	4.7956	3	4.2087	3	1.0196	3	1.2102	3	1.0607
4	5.4952	4	3.9128	4	3.5201	4	3.4206	4	3.603	4	3.4897	4	5.7543	4	4.34	4	3.7941	4	1.0284	4	1.2267	4	1.0593
5	4.9516	5	3.5008	5	3.1635	5	3.0402	5	3.3718	5	3.1964	5	5.0098	5	3.8988	5	3.3927	5	0.9907	5	1.213	5	1.0074
6	4.2183	6	2.8708	6	2.5847	6	2.6853	6	3.0748	6	2.8161	6	4.0792	6	3.5049	6	3.0228	6	1.0385	6	1.2785	6	1.083
7	3.5875	7	2.2041	7	1.9383	7	2.2708	7	2.6228	7	2.3731	7	3.2935	7	2.9821	7	2.6331	7	0.9649	7	1.1917	7	0.9535
8	3.0792	8	1.7262	8	1.559	8	1.6969	8	2.1027	8	1.8159	8	2.546	8	2.4578	8	2.1005	8	0.8665	8	1.1005	8	0.832
9	3.4477	9	1.7807	9	1.6733	9	1.4014	9	1.7628	9	1.519	9	1.8756	9	2.0249	9	1.769	9	0.9102	9	1.182	9	0.9285
10	4.0294	10	2.2877	10	2.132	10	1.648	10	1.8802	10	1.7694	10	1.9866	10	2.0682	10	1.8977	10	0.9432	10	1.1863	10	0.9826
11	4.4158	11	2.7373	11	2.4976	11	2.2723	11	2.3052	11	2.2911	11	2.5719	11	2.4297	11	2.3266	11	0.845	11	1.0547	11	0.8298
12	4.5556	12	3.0363	12	2.791	12	2.5553	12	2.5817	12	2.7241	12	3.0191	12	2.7204	12	2.6261	12	0.8171	12	1.09	12	0.8715
13	4.4208	13	3.1099	13	2.996	13	2.7302	13	2.6952	13	2.9916	13	3.2287	13	2.9005	13	2.7761	13	0.9479	13	1.217	13	1.077
14	4.1315	14	3.1992	14	2.7667	14	2.8615	14	2.9814	14	3.1375	14	3.245	14	3.0919	14	2.7503	14	0.9941	14	1.1367	14	0.9968
15	3.8093	15	2.955	15	2.7055	15	2.7183	15	2.6363	15	2.9393	15	2.9666	15	2.9529	15	2.5611	15	0.9284	15	1.1609	15	1.0453
16	3.3077	16	2.596	16	2.407	16	2.2817	16	2.5132	16	2.9577	16	2.5295	16	2.6003	16	2.2714	16	0.965	16	1.3019	16	1.2358
17	2.7663	17	2.1488	17	1.8987	17	1.9095	17	2.161	17	2.7117	17	2.1065	17	2.2417	17	2.0941	17	0.915	17	1.2707	17	1.1903
18	2.5747	18	1.8765	18	1.6117	18	1.5431	18	1.7089	18	2.2512	18	1.5533	18	1.7834	18	1.7783	18	1.042	18	1.3321	18	1.3487
19	2.9382	19	2.0171	19	1.8131	19	1.1965	19	1.2616	19	1.7409	19	1.0669	19	1.3653	19	1.1428	19	0.8724	19	1.2461	19	1.1571
20	3.6784	20	2.5895	20	2.3984	20	1.233	20	1.2508	20	1.6762	20	1.1217	20	1.4531	20	1.2327	20	0.8658	20	1.2114	20	1.0506
21	4.3155	21	3.1625	21	2.9605	21	1.6886	21	1.7414	21	2.0695	21	1.6163	21	1.977	21	1.6931	21	0.8553	21	1.1805	21	0.9715
22	4.7309	22	3.5155	22	3.2873	22	2.0286	22	2.0531	22	2.3878	22	1.9273	22	2.3485	22	2.0414	22	0.9252	22	1.2067	22	0.9832
23	4.8561	23	3.6667	23	3.3783	23	2.222	23	2.2117	23	2.582	23	2.0291	23	2.5273	23	2.2432	23	0.8757	23	1.1428	23	0.9113
24	4.5842	24	3.48	24	3.1583	24	2.2845	24	2.2421	24	2.6891	24	2.0066	24	2.5715	24	2.2945	24	0.7703	24	1.0484	24	0.7952
25	3.9925	25	3.1871	25	2.7939	25	2.1058	25	2.0415	25	2.4845	25	1.8485	25	2.3555	25	2.0861	25	0.8123	25	1.0648	25	0.7948
26	3.3369	26	2.6008	26	2.1683	26	1.8602	26	1.784	26	2.2038	26	1.6388	26	2.0477	26	1.8157	26	0.8587	26	1.0723	26	0.8293
27	2.5987	27	2.0337	27	1.6096	27	1.5231	27	1.4417	27	1.8321	27	1.2483	27	1.7064	27	1.5118	27	0.7863	27	0.9786	27	0.7566
28	2.0867	28	1.7018	28	1.4108	28	1.2367	28	1.1081	28	1.4412	28	0.9367	28	1.3671	28	1.221	28	0.7442	28	0.9229	28	0.6799
29	2.1633	29	1.8926	29	1.6549	29	1.1355	29	0.9393	29	1.1559	29	0.8809	29	1.2249	29	1.0917	29	0.8187	29	0.9895	29	0.7772
30	2.5579	30	2.256	30	1.9545	30	1.4188	30	1.2398	30	1.3724	30	1.2262	30	1.5217	30	1.3681	30	0.8845	30	0.9816	30	0.8536
31	2.8853	31	2.5815	31	2.2362	31	1.7336	31	1.6117	31	1.6781	31	1.5391	31	1.8493	31	1.7198	31	0.9126	31	0.8889	31	0.7825
32	2.9927	32	2.7473	32	2.4019	32	2.0038	32	1.8054	32	1.9457	32	1.8261	32	2.1562	32	2.0282	32	0.8984	32	0.8876	32	0.749
33	2.8703	33	2.7339	33	2.3725	33	2.181	33	1.9895	33	2.1486	33	2.0509	33	2.3717	33	2.3202	33	0.8589	33	0.9817	33	0.8669
34	2.7546	34	2.5618	34	2.1914	34	2.1951	34	2.0739	34	2.1976	34	2.1697	34	2.466	34	2.4646	34	0.9126	34	0.979	34	0.9499
35	2.598	35	2.3449	35	1.9792	35	2.1195	35	1.9391	35	2.1302	35	2.1625	35	2.4366	35	2.3845	35	0.9044	35	0.9001	35	0.8918
36	2.1894	36	2.0093	36	1.6938	36	1.9747	36	1.7435	36	1.9591	36	2.0399	36	2.2937	36	2.1962	36	0.8891	36	0.9272	36	0.9182
37	1.7064	37	1.567	37	1.3613	37	1.6511	37	1.5083	37	1.6987	37	1.8461	37	1.9966	37	1.9853	37	0.932	37	0.9758	37	1.0501
38	1.2652	38	1.2205	38	1.0869	38	1.2583	38	1.1546	38	1.3345	38	1.4693	38	1.5464	38	1.5957	38	0.9865	38	0.9487	38	1.0987
39	1.2691	39	1.2169	39	1.1096	39	1.0048	39	0.9909	39	1.1588	39	1.2408	39	1.3524	39	1.4142	39	0.9711	39	0.9082	39	1.0592
40	1.7389	40	1.7275	40	1.6221	40	1.1581	40	1.1513	40	1.2576	40	1.3783	40	1.4385	40	1.5427	40	0.9956	40	1.0015	40	1.1552
41	2.1593	41	2.0976	41	1.9973	41	1.6317	41	1.5795	41	1.6472	41	1.8523	41	1.8356	41	1.9536	41	1.0998	41	1.0935	41	1.3184
42	2.313	42	2.2869	42	2.1936	42	2.0453	42	1.9289	42	1.9605	42	2.2588	42	2.208	42	2.3424	42	1.1404	42	1.0114	42	1.317
43	2.3817	43	2.39	43	2.2772	43	2.2425	43	2.0893	43	2.1088	43	2.5871	43	2.4037	43	2.5715	43	1.1231	43	1.0179	43	1.301
44	2.3724	44	2.2953	44	2.2197	44	2.146	44	2.0571	44	2.1295	44	2.4786	44	2.3954	44	2.5647	44	1.2208	44	1.1625	44	1.4708
45	2.1244	45	2.0022	45	1.9467	45	2.1161	45	2.0152	45	2.0128	45	2.4326	45	2.3279	45	2.4996	45	1.3378	45	1.2249	45	1.5726
46	2.0705	46	1.78	46	1.8532	46	1.9397	46	1.9315	46	2.0407	46	2.6282	46	2.23	46	2.3482	46	1.3272	46	1.1874	46	1.5281
47	1.658	47	1.4283	47	1.5016	47	1.6203	47	1.6581	47	2.0845	47	2.2859	47	1.9485	47	2.0556	47	1.3638	47	1.3037	47	1.5979
48	1.2219	48	1.1075	48	1.0402	48	1.2243	48	1.2654	48	1.6012	48	1.9121	48	1.5525	48	1.7032	48	1.5208	48	1.5368	48	1.8189
49	1.348	49	1.205	49	1.1449	49	1.0118	49	1.0531	49	1.1103	49	1.678	49	1.3383	49	1.4965	49	1.6218	49	1.6113	49	1.8828
50	1.9169	50	1.6973	50	1.6706	50	1.1979	50	1.2041	50	1.233	50	1.8774	50	1.4941	50	1.6134	50	1.644	50	1.6295	50	1.8732
51	2.3503	51	2.0769	51	2.0541	51	1.6339	51	1.5796	51	1.5817	51	2.3496	51	1.9073	51	1.9707	51	1.6977	51	1.6992	51	1.9854
52	2.567	52	2.1288	52	2.1176	52	2.0183	52	1.9407	52	1.9115	52	2.7884	52	2.382	52	2.3291	52	1.477	52	1.445	52	1.7703
53	2.6162	53	2.1853	53	2.1335	53	2.1916	53	2.1281	53	2.1144	53	2.9529	53	2.6926	53	2.5337	53	1.398	53	1.4734	53	1.6975
54	2.5738	54	2.1413	54	2.1446	54	2.2398	54	2.2018	54	2.1642	54	2.9497	54	2.7734	54	2.6023	54	1.3062	54	1.3332	54	1.561
55	2.4786	55	2.0235	55	2.0581	55	2.0637	55	2.0667	55	2.0507	55	2.8026	55	2.6824	55	2.4069	55	1.1783	55	1.1918	55	1.3612
56	1.9881	56	1.7682	56	1.7515	56	1.8843	56	2.0221	56	1.8728	56	2.7589	56	2.5761	56	2.1396	56	1.17	56	1.0799	56	1.2491
57	1.379	57	1.3688	57	1.3549	57	1.5977	57	1.6662	57	1.7736	57	2.4242	57	2.07	57	2.0211	57	1.172	57	0.994	57	1.1578
58	1.2649	58	1.1366	58	1.2598	58	1.3509	58	1.2433	58	1.5257	58	1.9048	58	1.5325	58	1.6179	58	1.2478	58	0.9863	58	1.2686
59	1.8512	59	1.3686	59	1.5521	59	1.1606	59	1.1316	59	1.3077	59	1.5931	59	1.3251	59	1.3257	59	1.1409	59	0.9306	59	1.2032
60	2.5431	60	1.7825	60	1.8118	60	1.4514	60	1.3802	60	1.5732	60	1.8106	60	1.4892	60	1.4542	60	1.0432	60	0.8641	60	1.0642
61	3.1574	61	2.1492	61	2.0632	61	1.8551	61	1.7231	61	1.8982	61	2.2655	61	1.8207	61	1.7442	61	1.1542	61	0.8479	61	1.1298
62	3.5906	62	2.4205	62	2.2909	62	2.2604	62	2.072	62	2.2885	62	2.779	62	2.21	62	2.1131	62	1.2386	62	0.8417	62	1.2298
63	3.8441	63	2.5871	63	2.4508	63	2.4737	63	2.3667	63	2.5959	63	3.0605	63	2.4995	63	2.4117	63	1.1384	63	0.8507	63	1.1664
64	3.8842	64	2.5819	64	2.4553	64	2.4779	64	2.4334	64	2.6569	64	3.0293	64	2.6304	64	2.4699	64	1.2845	64	0.8935	64	1.1425
65	3.8367	65	2.4743	65	2.4404	65	2.3161	65	2.2831	65	2.5267	65	2.7701	65	2.5009	65	2.4253	65	1.6906	65	0.8964	65	1.396
66	3.5478	66	2.2078	66	2.117	66	2.0785	66	2.1145	66	2.3126	66	2.3759	66	2.365	66	2.384	66	2.0678	66	1.0085	66	1.5661
67	3.0718	67	1.7962	67	1.6072	67	1.8399	67	1.7808	67	1.9163	67	1.9701	67	2.0582	67	2.0777	67	3.1564	67	1.2941	67	1.9208
68	2.9165	68	1.6172	68	1.3913	68	1.5307	68	1.4461	68	1.5375	68	1.6108	68	1.6946	68	1.6321	68	1.3599	68	1.4601	68	1.2698
69	3.2919	69	1.854	69	1.6034	69	1.1875	69	1.1721	69	1.2456	69	1.3335	69	1.4128	69	1.2964	69	1.1003	69	1.2806	69	1.0529
70	4.1135	70	2.4256	70	2.1496	70	1.2048	70	1.2468	70	1.2423	70	1.3883	70	1.5034	70	1.4312	70	1.0537	70	1.2212	70	1
71	4.857	71	2.9024	71	2.6766	71	1.686	71	1.7265	71	1.7205	71	1.8691	71	1.9826	71	1.9735	71	1.0767	71	1.2547	71	1.0573
72	5.2934	72	3.2054	72	2.9958	72	2.0182	72	2.0697	72	2.0246	72	2.2215	72	2.32	72	2.439	72	1.0965	72	1.2632	72	1.0876
73	5.3202	73	3.2131	73	3.0827	73	2.1373	73	2.2054	73	2.131	73	2.3705	73	2.4879	73	2.6575	73	1.1312	73	1.3307	73	1.1598
74	5.1695	74	2.9872	74	2.941	74	2.1761	74	2.2393	74	2.1062	74	2.278	74	2.5494	74	2.6048	74	1.025	74	1.2341	74	1.0626
75	4.6851	75	2.7169	75	2.7012	75	2.1501	75	2.1349	75	2.0347	75	2.1676	75	2.4397	75	2.3609	75	0.9695	75	1.1487	75	1.0033
76	4.0207	76	2.4264	76	2.3968	76	1.9706	76	2.0222	76	1.7548	76	1.8948	76	2.2043	76	2.0672	76	1.0548	76	1.2458	76	1.1481
77	3.1765	77	2.001	77	2.0063	77	1.6255	77	1.8068	77	1.5923	77	1.5393	77	1.8756	77	1.8566	77	1.0527	77	1.2763	77	1.1864
78	2.6062	78	1.5709	78	1.561	78	1.2983	78	1.3432	78	1.1989	78	1.157	78	1.5586	78	1.5444	78	0.9687	78	1.1509	78	1.1116
79	2.944	79	1.7883	79	1.6993	79	1.1338	79	1.0744	79	1.1141	79	0.9912	79	1.4585	79	1.2707	79	1.0102	79	1.1714	79	1.1928
80	3.6473	80	2.4149	80	2.2488	80	1.2896	80	1.1731	80	1.3884	80	1.1811	80	1.6234	80	1.41	80	1.127	80	1.3373	80	1.3607
81	4.0769	81	2.8999	81	2.5969	81	1.8323	81	1.6288	81	1.9437	81	1.7428	81	2.0652	81	1.9129	81	1.1565	81	1.3523	81	1.3831
82	4.2768	82	3.2102	82	2.7734	82	2.2592	82	1.9797	82	2.4131	82	2.2142	82	2.4233	82	2.2794	82	1.1402	82	1.2731	82	1.4008
83	4.3341	83	3.3428	83	2.8039	83	2.3167	83	2.0654	83	2.627	83	2.3904	83	2.5698	83	2.3703	83	1.2363	83	1.4221	83	1.577
84	4.0362	84	3.2822	84	2.6837	84	2.3771	84	2.0197	84	2.6079	84	2.3028	84	2.6334	84	2.4292	84	1.2366	84	1.4538	84	1.5708
85	3.7221	85	3.2369	85	2.6058	85	2.3205	85	2.0617	85	2.6135	85	2.1423	85	2.6049	85	2.4354	85	1.4063	85	1.6782	85	1.8197
86	3.3363	86	2.9649	86	2.4066	86	2.0467	86	1.8	86	2.3713	86	2.0622	86	2.5637	86	2.1746	86	1.2493	86	1.4438	86	1.5446
87	2.9269	87	2.5328	87	2.2331	87	1.6824	87	1.5593	87	1.8036	87	1.8759	87	2.1735	87	1.9303	87	1.1875	87	1.3372	87	1.3701
88	2.8492	88	2.663	88	2.3331	88	1.2438	88	1.1557	88	1.2714	88	1.3587	88	1.7161	88	1.4677	88	1.1654	88	1.2406	88	1.2522
89	4.3543	89	4.146	89	3.3922	89	1.0657	89	0.9736	89	1.0669	89	1.1103	89	1.5779	89	1.2323	89	1.1928	89	1.2476	89	1.1984
90	4.0071	90	3.7121	90	2.9905	90	1.3629	90	1.184	90	1.3637	90	1.2882	90	1.8315	90	1.4628	90	1.165	90	1.1361	90	1.1235
91	3.4678	91	3.1171	91	2.5396	91	1.7028	91	1.5304	91	1.7225	91	1.5441	91	2.1115	91	1.7945	91	1.0474	91	1.0428	91	1.0385
92	2.8686	92	2.4135	92	2.0011	92	1.8481	92	1.7302	92	1.9252	92	1.7649	92	2.2455	92	2.0461	92	1.0126	92	1.0794	92	0.9935
93	2.4093	93	1.8735	93	1.6211	93	1.9392	93	1.8593	93	2.0468	93	1.9577	93	2.3626	93	2.2128	93	1.051	93	1.0677	93	0.9618
94	2.603	94	1.9603	94	1.7217	94	1.9727	94	1.895	94	2.1015	94	2.0384	94	2.3989	94	2.3668	94	0.9965	94	0.9501	94	0.8888
95	3.3151	95	2.4553	95	2.1969	95	1.9272	95	1.8469	95	2.0624	95	1.9666	95	2.3104	95	2.2964	95	0.8884	95	0.9054	95	0.8025
96	3.9403	96	2.875	96	2.665	96	1.8101	96	1.7553	96	1.9848	96	1.8489	96	2.1055	96	2.0469	96	0.9204	96	0.9875	96	0.7977
97	4.3331	97	2.9437	97	2.858	97	1.6622	97	1.5603	97	1.7583	97	1.621	97	1.8069	97	1.8378	97	0.9823	97	0.9711	97	0.8074
98	4.7285	98	2.9492	98	2.9313	98	1.322	98	1.1689	98	1.3558	98	1.1387	98	1.3603	98	1.3685	98	0.8933	98	0.8712	98	0.7375
99	5.0241	99	2.9074	99	2.8456	99	0.9836	99	0.9418	99	1.1016	99	0.8154	99	1.1334	99	1.0585	99	0.7945	99	0.8739	99	0.6763
100	4.7351	100	2.8555	100	2.7015	100	1.0959	100	1.0688	100	1.2074	100	0.9406	100	1.298	100	1.1564	100	0.8177	100	0.9044	100	0.717
101	4.1086	101	2.496	101	2.2847	101	1.6345	101	1.522	101	1.6682	101	1.4665	101	1.7908	101	1.6027	101	0.8319	101	0.89	101	0.7372
102	3.3713	102	2.0786	102	1.8096	102	2.1352	102	1.9004	102	2.1175	102	1.9015	102	2.2031	102	2.0246	102	0.7723	102	0.8553	102	0.6808
103	2.946	103	1.6832	103	1.518	103	2.5868	103	2.1537	103	2.4106	103	2.1887	103	2.4322	103	2.3077	103	0.7607	103	0.9053	103	0.6724
104	3.1426	104	1.7931	104	1.7568	104	2.4413	104	2.2245	104	2.3465	104	2.2977	104	2.4584	104	2.3337	104	0.7958	104	0.9606	104	0.7485
105	3.9012	105	2.3159	105	2.2675	105	2.3468	105	2.1163	105	2.2461	105	2.2688	105	2.368	105	2.2162	105	0.7768	105	0.9063	105	0.751
106	4.6339	106	2.7833	106	2.6846	106	2.167	106	1.9018	106	2.0007	106	2.2335	106	2.0996	106	2.1114	106	0.6924	106	0.8608	106	0.709
107	5.1446	107	3.0027	107	2.9027	107	1.9397	107	1.7798	107	1.8236	107	2.1103	107	1.9071	107	1.9094	107	0.7098	107	0.9337	107	0.7752
108	5.372	108	3.0542	108	2.9123	108	1.5617	108	1.5014	108	1.5694	108	1.8033	108	1.6784	108	1.7579	108	0.8	108	0.9743	108	0.8795
109	5.1104	109	2.947	109	2.7739	109	1.3104	109	1.1454	109	1.3677	109	1.3791	109	1.4599	109	1.4189	109	0.724	109	0.9275	109	0.8993
110	4.4945	110	2.628	110	2.4306	110	1.573	110	1.3069	110	1.5978	110	1.4351	110	1.6354	110	1.5326	110	0.6498	110	0.959	110	0.8757
111	3.7167	111	2.1679	111	1.9707	111	2.0828	111	1.9461	111	2.1859	111	2.0514	111	2.168	111	2.0607	111	0.6633	111	1.0671	111	1.0767
112	2.9259	112	1.7151	112	1.5116	112	2.4041	112	2.4187	112	2.6421	112	2.6072	112	2.6734	112	2.5989	112	0.6556	112	1.0527	112	1.1279
113	2.4457	113	1.5065	113	1.2878	113	2.6192	113	2.7112	113	2.9383	113	3.0207	113	3.0248	113	3.0256	113	0.6354	113	1.0328	113	1.0199
114	2.4692	114	1.6795	114	1.4751	114	2.669	114	2.833	114	3.0612	114	3.2571	114	3.1837	114	3.2267	114	0.6524	114	1.125	114	1.104
115	2.7762	115	1.9698	115	1.7887	115	2.5103	115	2.6635	115	2.9017	115	3.2254	115	3.0501	115	3.2222	115	0.6916	115	1.215	115	1.2651
116	3.1647	116	2.2542	116	2.0945	116	2.3614	116	2.5118	116	2.7046	116	3.1176	116	2.9079	116	3.2026	116	0.7113	116	1.1841	116	1.2418
117	3.2672	117	2.3578	117	2.2994	117	2.0477	117	2.2414	117	2.3804	117	2.9741	117	2.665	117	3.204	117	0.8028	117	1.3223	117	1.2908
118	3.2222	118	2.3923	118	2.3837	118	1.7591	118	1.8255	118	2.0379	118	2.5547	118	2.4227	118	3.5272	118	0.8906	118	1.4331	118	1.4219
119	3.2547	119	2.3786	119	2.2311	119	1.8762	119	1.8363	119	1.9471	119	2.569	119	2.5878	119	4.2022	119	0.8165	119	1.3138	119	1.2774
120	2.9298	120	2.1965	120	2.1237	120	3.3154	120	3.2804	120	3.2586	120	3.7326	120	3.792	120	5.2137	120	0.8513	120	1.3026	120	1.2417
121	2.2748	121	1.8087	121	1.9468	121	2.9572	121	3.0672	121	2.8767	121	3.289	121	3.4093	121	4.5118	121	0.7817	121	1.2201	121	1.1306
122	1.6282	122	1.2818	122	1.5152	122	2.4594	122	2.615	122	2.415	122	2.7276	122	2.9257	122	3.6594	122	0.7331	122	1.1192	122	0.9628
123	1.2642	123	1.0505	123	1.0921	123	1.8852	123	1.9858	123	1.9464	123	2.2106	123	2.3917	123	2.7712	123	0.7229	123	1.0663	123	0.8793
124	1.449	124	1.1826	124	1.1671	124	1.4518	124	1.4955	124	1.64	124	1.8822	124	1.9976	124	2.061	124	0.7468	124	1.0326	124	0.8359
125	2	125	1.6413	125	1.6055	125	1.524	125	1.5574	125	1.7386	125	2.1023	125	2.0344	125	2.0896	125	0.7279	125	1.0106	125	0.8579
126	2.3429	126	2.0032	126	1.9612	126	1.9579	126	2.0022	126	2.2264	126	2.6785	126	2.3804	126	2.5232	126	0.656	126	0.9124	126	0.8205
127	2.5061	127	2.1785	127	2.1224	127	2.4415	127	2.4602	127	2.6528	127	3.13	127	2.7205	127	2.879	127	0.6943	127	0.8858	127	0.76
128	2.595	128	2.2023	128	2.1387	128	2.6505	128	2.6488	128	2.7781	128	3.1272	128	2.8503	128	2.8988	128	0.7991	128	0.8843	128	0.8643
129	2.5071	129	2.0871	129	2.0488	129	2.5059	129	2.5546	129	2.7443	129	2.9305	129	2.7917	129	2.7703	129	0.7816	129	0.8271	129	0.8941
130	2.2133	130	1.8459	130	1.8352	130	2.4484	130	2.4	130	2.6073	130	2.6408	130	2.6581	130	2.5601	130	0.8063	130	0.8508	130	0.8536
131	1.8761	131	1.58	131	1.5806	131	2.2858	131	2.1628	131	2.418	131	2.2835	131	2.4994	131	2.2363	131	1.0451	131	0.8997	131	0.9445
132	1.4923	132	1.2995	132	1.3176	132	2.1642	132	1.725	132	2.0022	132	1.8407	132	2.0708	132	1.8568	132	1.1857	132	0.929	132	1.1188
133	1.1617	133	1.1063	133	1.098	133	1.7404	133	1.2682	133	1.5493	133	1.3451	133	1.5817	133	1.4612	133	1.2769	133	0.9663	133	1.0074
134	1.3931	134	1.2878	134	1.2748	134	1.2095	134	1.0215	134	1.2663	134	1.0882	134	1.2817	134	1.1947	134	1.7999	134	0.9405	134	1.0089
135	1.7322	135	1.6785	135	1.6036	135	1.3052	135	1.1877	135	1.4292	135	1.2807	135	1.3685	135	1.338	135	2.2988	135	1.2303	135	1.5736
136	2.0597	136	2.0477	136	1.9105	136	1.8296	136	1.6456	136	1.8054	136	1.7068	136	1.8178	136	1.8033	136	1.2023	136	1.2468	136	1.2719
137	2.1971	137	2.2701	137	2.0614	137	2.2158	137	1.9645	137	2.0533	137	2.0015	137	2.1678	137	2.1725	137	0.924	137	1.0035	137	1.0468
138	2.2406	138	2.3659	138	2.153	138	2.2307	138	2.0626	138	2.1285	138	2.0791	138	2.3273	138	2.293	138	0.8791	138	0.9434	138	0.9789
139	2.248	139	2.3254	139	2.1597	139	2.1906	139	2.0068	139	2.1097	139	1.9753	139	2.3035	139	2.2198	139	0.856	139	0.9355	139	0.9285
140	2.1039	140	2.1094	140	1.905	140	2.0452	140	1.8957	140	1.9824	140	1.8403	140	2.2014	140	2.1386	140	0.8137	140	0.9163	140	0.8529
141	1.7605	141	1.7528	141	1.5289	141	1.8704	141	1.6792	141	1.7233	141	1.5477	141	1.9584	141	1.8622	141	0.8372	141	0.9527	141	0.8443
142	1.3705	142	1.2767	142	1.1243	142	1.3824	142	1.3476	142	1.3954	142	1.2324	142	1.6284	142	1.4949	142	0.7602	142	0.9016	142	0.7853
143	1.4874	143	1.2682	143	1.1093	143	1.0399	143	1.0686	143	1.1555	143	1.0294	143	1.3317	143	1.2121	143	0.6991	143	0.8172	143	0.7123
144	2.0369	144	1.7493	144	1.553	144	0.9375	144	0.977	144	1.0973	144	0.9928	144	1.1988	144	1.1252	144	0.7405	144	0.8411	144	0.7203
145	2.634	145	2.3177	145	1.9843	145	1.1425	145	1.1919	145	1.3735	145	1.2678	145	1.459	145	1.3984	145	0.7361	145	0.8589	145	0.7205
146	3.0766	146	2.7481	146	2.2959	146	1.4364	146	1.444	146	1.6605	146	1.532	146	1.8159	146	1.7249	146	0.6665	146	0.7915	146	0.6655
147	3.3807	147	2.9598	147	2.4602	147	1.749	147	1.7066	147	1.9057	147	1.8223	147	2.1389	147	2.0735	147	0.6595	147	0.7465	147	0.626
148	3.6023	148	3.1315	148	2.5249	148	1.9571	148	1.9195	148	2.14	148	2.0723	148	2.4454	148	2.3371	148	0.7053	148	0.7732	148	0.682
149	3.6558	149	3.1185	149	2.443	149	2.0807	149	2.0244	149	2.3054	149	2.1527	149	2.6273	149	2.4603	149	0.733	149	0.838	149	0.7365
150	3.5307	150	2.8329	150	2.3331	150	2.0706	150	2.0773	150	2.3855	150	2.0411	150	2.5737	150	2.2928	150	0.7265	150	0.7942	150	0.6954
151	3.0844	151	2.4537	151	2.211	151	2.1573	151	1.9249	151	2.0029	151	1.7892	151	2.3266	151	2.093	151	0.7525	151	0.7754	151	0.711
152	2.5608	152	2.078	152	1.855	152	1.9262	152	1.6184	152	1.8332	152	1.6469	152	2.1259	152	1.9271	152	0.738	152	0.7567	152	0.6575
153	2.3132	153	1.8467	153	1.5562	153	1.4037	153	1.1652	153	1.3766	153	1.3051	153	1.7904	153	1.4818	153	0.9154	153	0.9264	153	0.7466
154	2.6851	154	2.1494	154	1.8217	154	1.1702	154	0.9701	154	1.1391	154	1.1046	154	1.5568	154	1.2547	154	0.7465	154	0.7298	154	0.692
155	3.5024	155	2.8383	155	2.4854	155	1.2599	155	1.0746	155	1.2478	155	1.2181	155	1.5843	155	1.3539	155	0.718	155	0.6982	155	0.6923
156	4.1664	156	3.336	156	3.0185	156	1.7724	156	1.5512	156	1.769	156	1.7045	156	1.9811	156	1.798	156	0.7315	156	0.7161	156	0.708
157	4.6586	157	3.6205	157	3.3491	157	2.197	157	1.9137	157	2.2755	157	2.0657	157	2.337	157	2.1385	157	0.7741	157	0.8085	157	0.7804
158	4.8637	158	3.6801	158	3.4444	158	2.4569	158	2.0645	158	2.5233	158	2.2326	158	2.5097	158	2.3242	158	0.7761	158	0.76	158	0.7727
159	4.8083	159	3.4352	159	3.2063	159	2.4613	159	2.1278	159	2.5323	159	2.2983	159	2.5449	159	2.379	159	0.6968	159	0.6783	159	0.6854
160	4.4389	160	2.9962	160	2.7582	160	2.2493	160	2.0688	160	2.367	160	2.1884	160	2.4579	160	2.3204	160	0.698	160	0.734	160	0.7118
161	3.876	161	2.5089	161	2.2902	161	1.91	161	1.8507	161	2.0299	161	1.8856	161	2.1936	161	2.071	161	0.739	161	0.7672	161	0.7713
162	3.2502	162	2.0182	162	1.8009	162	1.6005	162	1.5722	162	1.6827	162	1.5898	162	1.9295	162	1.7645	162	0.7149	162	0.7021	162	0.7308
163	2.7178	163	1.7268	163	1.5041	163	1.2562	163	1.2569	163	1.4578	163	1.2969	163	1.6307	163	1.4573	163	0.6657	163	0.6756	163	0.6792
164	2.5341	164	1.9397	164	1.6521	164	1.0442	164	1.0989	164	1.0817	164	1.0499	164	1.4232	164	1.2867	164	0.7089	164	0.7398	164	0.7536
165	2.9127	165	2.4353	165	2.1854	165	1.1641	165	1.2553	165	1.1634	165	1.125	165	1.5186	165	1.4009	165	0.7511	165	0.7374	165	0.8032
166	3.3538	166	2.7793	166	2.5812	166	1.5308	166	1.6273	166	1.488	166	1.5052	166	1.8333	166	1.73	166	0.731	166	0.6971	166	0.742
167	3.7636	167	2.9924	167	2.6929	167	1.8894	167	1.9731	167	1.8477	167	1.9067	167	2.1547	167	2.1245	167	0.7208	167	0.7099	167	0.7374
168	4.2728	168	3.0819	168	2.7466	168	2.0985	168	2.1846	168	2.0626	168	2.1592	168	2.379	168	2.3765	168	0.7371	168	0.7469	168	0.8058
169	4.546	169	3.0322	169	2.6837	169	2.2466	169	2.3133	169	2.1956	169	2.4887	169	2.6094	169	2.5572	169	0.7581	169	0.7557	169	0.8206
170	4.769	170	2.8785	170	2.4745	170	2.2368	170	2.2795	170	2.2629	170	2.5755	170	2.5823	170	2.5686	170	0.7264	170	0.7422	170	0.7707
171	4.583	171	2.6739	171	2.3924	171	2.0819	171	2.0314	171	2.0932	171	2.2174	171	2.382	171	2.3416	171	0.6946	171	0.7687	171	0.8065
172	4.2923	172	2.3043	172	2.1712	172	1.7281	172	1.5872	172	1.7175	172	1.8889	172	1.9687	172	1.9019	172	0.6992	172	0.7629	172	0.8574
173	4.0511	173	2.2815	173	2.0962	173	1.2333	173	1.2427	173	1.3719	173	1.6025	173	1.4859	173	1.4223	173	0.7091	173	0.7582	173	0.832
174	4.5015	174	2.986	174	2.7478	174	1.1829	174	1.192	174	1.3348	174	1.5409	174	1.3724	174	1.3176	174	0.6648	174	0.775	174	0.8288
175	5.4657	175	3.9249	175	3.7006	175	1.5633	175	1.5204	175	1.6767	175	1.8867	175	1.6874	175	1.6653	175	0.6779	175	0.7916	175	0.8878
176	6.1621	176	4.7565	176	4.479	176	1.9893	176	1.9494	176	2.1222	176	2.3919	176	2.1591	176	2.0607	176	0.7668	176	0.8214	176	0.9321
177	2.4863	177	1.4748	177	1.404	177	2.2844	177	2.2018	177	2.4375	177	2.7914	177	2.3849	177	2.2918	177	0.7042	177	0.825	177	0.9215
178	2.2475	178	1.2717	178	1.2137	178	2.4393	178	2.2969	178	2.536	178	3.0358	178	2.4456	178	2.3833	178	0.6762	178	0.8429	178	0.92
179	2.185	179	1.2251	179	1.1429	179	2.5751	179	2.357	179	2.5609	179	3.13	179	2.5008	179	2.4358	179	0.6996	179	0.868	179	0.9534
180	2.3077	180	1.2868	180	1.1807	180	2.4502	180	2.1995	180	2.4443	180	3.0837	180	2.4406	180	2.3376	180	0.6892	180	0.8716	180	0.9413
181	2.4366	181	1.3614	181	1.1913	181	2.119	181	1.9425	181	2.1193	181	2.9436	181	2.1081	181	2.1713	181	0.6549	181	0.8894	181	0.9263
182	2.6239	182	1.4826	182	1.2679	182	1.7513	182	1.5994	182	1.7761	182	2.3902	182	1.9411	182	1.9001	182	0.6977	182	0.9407	182	1.005
183	2.3677	183	1.3433	183	1.1552	183	1.3177	183	1.2567	183	1.4745	183	1.8217	183	1.6355	183	1.5719	183	0.7442	183	0.9733	183	1.0525
184	2.1117	184	1.1976	184	1.0362	184	1.265	184	1.0306	184	1.2698	184	1.5406	184	1.3029	184	1.4137	184	0.746	184	0.9927	184	1.0293
185	2.3712	185	1.3492	185	1.1427	185	1.4054	185	1.2338	185	1.3101	185	1.7185	185	1.5645	185	1.6109	185	0.8261	185	1.101	185	1.2378
186	2.4536	186	1.42	186	1.2037	186	1.742	186	1.7197	186	1.7558	186	2.2135	186	2.1099	186	2.0784	186	0.909	186	1.1589	186	1.7202
187	2.1287	187	1.2379	187	1.0778	187	2.0264	187	2.0192	187	2.0204	187	2.7636	187	2.5231	187	2.422	187	0.8277	187	1.0397	187	1.4863
188	2.1489	188	1.235	188	1.0709	188	2.2111	188	2.1936	188	2.2122	188	3.078	188	2.7371	188	2.661	188	0.8549	188	1.0218	188	1.3963
189	2.5181	189	1.4728	189	1.2523	189	2.2482	189	2.2172	189	2.2018	189	3.0129	189	2.7573	189	2.7722	189	0.7964	189	0.9945	189	1.2471
190	2.4872	190	1.492	190	1.3022	190	2.0434	190	2.0192	190	2.0905	190	2.9764	190	2.5347	190	2.5553	190	0.7537	190	0.962	190	1.1499
191	2.2656	191	1.3361	191	1.2226	191	1.7302	191	1.6779	191	2.0136	191	2.5775	191	2.1372	191	2.2172	191	0.7356	191	1.0001	191	1.1174
192	2.5418	192	1.473	192	1.3262	192	1.4818	192	1.4312	192	1.6389	192	2.1885	192	1.8098	192	1.9104	192	0.7551	192	1.0552	192	1.1136
193	2.5752	193	1.4692	193	1.3014	193	1.219	193	1.1797	193	1.3476	193	1.7606	193	1.4793	193	1.5959	193	0.7438	193	1.043	193	1.1317
194	2.8634	194	1.7002	194	1.5027	194	1.1056	194	1.0695	194	1.131	194	1.5522	194	1.316	194	1.4408	194	0.684	194	0.9215	194	1.0073
195	2.6014	195	1.4728	195	1.2742	195	1.3463	195	1.1958	195	1.2749	195	1.6295	195	1.4767	195	1.5713	195	0.7198	195	0.9293	195	0.9726
196	2.5368	196	1.393	196	1.1921	196	1.7451	196	1.5813	196	1.723	196	2.0346	196	1.896	196	2.0235	196	0.7947	196	1.0212	196	1.0615
197	2.4166	197	1.3117	197	1.1208	197	1.995	197	1.8984	197	2.1241	197	2.3799	197	2.245	197	2.4221	197	0.7032	197	0.9837	197	0.9787
198	2.5015	198	1.3503	198	1.1573	198	2.0744	198	2.0028	198	2.1273	198	2.4153	198	2.4081	198	2.5773	198	0.7382	198	0.9811	198	0.8931
199	2.2288	199	1.2236	199	1.0521	199	2.159	199	2.1051	199	2.2288	199	2.4369	199	2.5094	199	2.6568	199	0.8649	199	0.9241	199	0.9058
200	1.9643	200	1.0732	200	0.9219	200	2.0832	200	2.0298	200	2.1563	200	2.314	200	2.4185	200	2.5412	200	1.0349	200	1.0438	200	0.9966
201	2.055	201	1.1136	201	0.959	201	1.7764	201	1.6343	201	1.8226	201	1.899	201	2.0575	201	2.0918	201	1.3411	201	0.972	201	0.9524
202	2.0573	202	1.1111	202	0.9747	202	1.5184	202	1.387	202	1.5696	202	1.568	202	1.7982	202	1.7681	202	2.2712	202	1.0371	202	0.9204
203	1.763	203	0.9757	203	0.8646	203	1.2612	203	1.1269	203	1.3208	203	1.2666	203	1.5263	203	1.4855	203	2.9374	203	1.5322	203	1.3331
204	1.6166	204	0.8907	204	0.7956	204	1.0868	204	0.9531	204	1.1868	204	1.0903	204	1.3335	204	1.3085	204	1.3329	204	1.3965	204	1.1946
205	1.7647	205	0.9546	205	0.8798	205	1.3358	205	1.2004	205	1.4258	205	1.3982	205	1.5574	205	1.5788	205	1.1103	205	1.0979	205	0.964
206	1.7161	206	0.965	206	0.9209	206	1.7773	206	1.58	206	1.8861	206	1.7299	206	1.9128	206	1.939	206	0.9313	206	1.0546	206	0.9771
207	1.4741	207	0.8827	207	0.8461	207	2.0765	207	1.8128	207	2.1624	207	1.8981	207	2.1649	207	2.1498	207	0.879	207	1.0563	207	1.022
208	1.4584	208	0.8858	208	0.8313	208	2.2228	208	1.9456	208	2.151	208	1.9708	208	2.3398	208	2.2531	208	0.8565	208	1.0777	208	1.0891
209	1.6142	209	0.9362	209	0.9271	209	2.2683	209	2.0425	209	2.2841	209	1.9824	209	2.4222	209	2.2681	209	0.897	209	1.0978	209	1.1439
210	1.6159	210	0.987	210	1.0054	210	2.0981	210	1.9296	210	2.0787	210	1.8151	210	2.2292	210	2.2264	210	0.8268	210	0.9934	210	1.0551
211	1.4639	211	0.9538	211	0.9745	211	1.854	211	1.6984	211	1.8327	211	1.5791	211	2.0231	211	1.8793	211	0.7725	211	0.9477	211	1.0027
212	1.5388	212	0.9997	212	1	212	1.5764	212	1.4607	212	1.5819	212	1.3801	212	1.7547	212	1.595	212	0.8271	212	1.0094	212	1.0943
213	1.7603	213	1.1415	213	1.1332	213	1.2473	213	1.163	213	1.3289	213	1.1141	213	1.4114	213	1.2853	213	0.831	213	0.9708	213	1.0882
214	1.7835	214	1.2198	214	1.2118	214	1.0074	214	0.9652	214	1.2368	214	0.8473	214	1.163	214	1.0438	214	0.7698	214	0.8723	214	0.9854
215	1.7315	215	1.2343	215	1.2057	215	1.1736	215	1.1623	215	1.529	215	0.9182	215	1.322	215	1.1563	215	0.7698	215	0.8841	215	1.0016
216	1.8711	216	1.3282	216	1.2752	216	1.6853	216	1.7068	216	2.1442	216	1.4038	216	1.8419	216	1.6669	216	0.8742	216	0.9509	216	1.1282
217	2.1255	217	1.5232	217	1.461	217	2.157	217	2.2309	217	2.6807	217	1.9362	217	2.389	217	2.1616	217	0.9484	217	0.9754	217	1.1619
218	2.1769	218	1.6296	218	1.5306	218	2.367	218	2.3589	218	2.8914	218	2.1063	218	2.536	218	2.2852	218	0.9406	218	0.9141	218	1.0928
219	2.1469	219	1.6442	219	1.5333	219	2.3649	219	2.3598	219	2.9	219	2.1221	219	2.5811	219	2.2508	219	0.9822	219	0.9859	219	1.1927
220	2.3838	220	1.8059	220	1.692	220	2.2008	220	2.1737	220	2.7774	220	2.0313	220	2.5282	220	2.1686	220	0.9323	220	0.9958	220	1.1977
221	2.6468	221	2.0356	221	1.8746	221	2.0676	221	1.9834	221	2.5431	221	1.9879	221	2.3842	221	2.0823	221	0.9607	221	1.0926	221	1.4192
222	2.5938	222	2.1091	222	1.9014	222	1.7937	222	1.8962	222	2.2545	222	1.8189	222	2.0738	222	1.9841	222	0.8396	222	0.9925	222	1.277
223	2.6184	223	2.1823	223	1.96	223	1.4955	223	1.6064	223	1.8954	223	1.5982	223	1.7174	223	1.5246	223	0.8302	223	1.028	223	1.2663
224	2.9657	224	2.429	224	2.1922	224	1.3219	224	1.3286	224	1.6884	224	1.4911	224	1.5705	224	1.326	224	0.8131	224	1.0583	224	1.2391
225	3.1451	225	2.6407	225	2.3464	225	1.6072	225	1.5601	225	1.8692	225	1.6407	225	1.9115	225	1.5153	225	0.8557	225	1.1352	225	1.2464
226	3.0598	226	2.7112	226	2.3679	226	2.1893	226	2.1162	226	2.3228	226	2.2133	226	2.3882	226	2.0661	226	0.8273	226	1.1192	226	1.1888
227	3.1145	227	2.6656	227	2.4171	227	2.4714	227	2.6044	227	2.7315	227	2.8566	227	2.7877	227	2.5073	227	0.7417	227	0.9959	227	1.0655
228	2.7822	228	2.267	228	2.105	228	2.6123	228	2.9075	228	2.9072	228	3.2476	228	3.0441	228	2.7618	228	0.7568	228	1.0017	228	1.0402
229	2.5697	229	1.9899	229	1.9116	229	2.6687	229	2.9215	229	2.9118	229	3.474	229	3.1009	229	2.8529	229	0.7771	229	1.0699	229	1.0494
230	2.3779	230	1.8707	230	1.7516	230	2.6097	230	2.8268	230	2.7855	230	3.4476	230	2.9839	230	2.8135	230	0.7293	230	1.0124	230	0.9702
231	2.149	231	1.6683	231	1.5585	231	2.4186	231	2.66	231	2.5941	231	3.3251	231	2.8438	231	2.662	231	0.6851	231	0.9327	231	0.8699
232	2.1279	232	1.6712	232	1.5583	232	2.1038	232	2.3616	232	2.319	232	3.0711	232	2.6622	232	2.4282	232	0.7227	232	0.9796	232	0.8957
233	2.1439	233	1.6812	233	1.5513	233	1.8181	233	2.0433	233	1.9605	233	3.0095	233	2.4822	233	2.19	233	0.7408	233	1.0224	233	0.9103
234	2.3307	234	1.839	234	1.7141	234	1.9099	234	2.0075	234	1.7688	234	3.595	234	2.6048	234	2.1511	234	0.697	234	0.9501	234	0.8215
235	2.1445	235	1.6788	235	1.5662	235	2.4388	235	2.584	235	2.2499	235	4.4534	235	3.2794	235	2.7469	235	0.6794	235	0.9128	235	0.7576
236	1.9287	236	1.4976	236	1.3972	236	3.1085	236	3.338	236	3.2134	236	5.2283	236	4.0643	236	3.4617	236	0.7378	236	0.9328	236	0.7706
237	2.1767	237	1.7029	237	1.591	237	3.6702	237	3.9605	237	3.8026	237	6.0725	237	4.6735	237	4.0373	237	0.7335	237	0.9454	237	0.7858
238	2.2655	238	1.7731	238	1.681	238	4.2588	238	4.5203	238	4.2449	238	7.0919	238	5.2735	238	4.6585	238	0.6949	238	0.8291	238	0.7259
239	2.0043	239	1.5473	239	1.4931	239	1.205	239	1.3893	239	1.2942	239	1.6029	239	1.4273	239	1.4029	239	0.6674	239	0.7881	239	0.6759
240	1.927	240	1.4908	240	1.484	240	0.9917	240	1.1338	240	1.0729	240	1.4008	240	1.1582	240	1.2023	240	0.6564	240	0.815	240	0.6787
241	2.3157	241	1.7699	241	1.8323	241	0.9268	241	0.9397	241	1.0357	241	1.2298	241	1.0733	241	1.0717	241	0.6812	241	0.7724	241	0.702
242	2.354	242	1.8165	242	2.0931	242	0.9441	242	0.8576	242	1.0439	242	1.0397	242	1.0608	242	1.0061	242	0.6564	242	0.698	242	0.6377
243	2.3399	243	1.9046	243	2.4434	243	0.9019	243	0.8192	243	1.0207	243	0.868	243	1.0093	243	0.9359	243	0.6429	243	0.7117	243	0.6103
244	2.4783	244	1.7578	244	1.6906	244	0.9581	244	0.8407	244	1.049	244	0.8321	244	1.0685	244	0.9594	244	0.7116	244	0.7743	244	0.7221
245	2.3517	245	1.4974	245	1.3547	245	0.8838	245	0.7757	245	0.9942	245	0.7823	245	1.0096	245	0.8922	245	0.7066	245	0.7694	245	0.7375
246	2.1543	246	1.362	246	1.2602	246	0.7747	246	0.7199	246	0.9065	246	0.7176	246	0.9012	246	0.7925	246	0.6663	246	0.7082	246	0.6616
247	2.143	247	1.3341	247	1.252	247	0.8421	247	0.7674	247	0.9856	247	0.7043	247	0.9523	247	0.8285	247	0.7108	247	0.7594	247	0.6758
248	2.0635	248	1.3225	248	1.2379	248	0.8826	248	0.7819	248	1.0398	248	0.705	248	1.0135	248	0.8894	248	0.7864	248	0.7945	248	0.6923
249	2.1602	249	1.3357	249	1.2762	249	0.7777	249	0.702	249	0.9431	249	0.6952	249	0.941	249	0.8089	249	0.7635	249	0.7599	249	0.67
250	2.0566	250	1.2148	250	1.1643	250	0.7541	250	0.7051	250	0.9225	250	0.6707	250	0.9107	250	0.745	250	0.8074	250	0.7933	250	0.6914
251	1.8713	251	1.1703	251	1.0979	251	0.8866	251	0.7956	251	1.0141	251	0.667	251	1.0258	251	0.8581	251	0.903	251	0.8506	251	0.7175
252	1.981	252	1.265	252	1.2238	252	0.9441	252	0.8015	252	1.021	252	0.7279	252	1.0933	252	0.9785	252	0.9386	252	0.8667	252	0.7295
253	2.0979	253	1.2624	253	1.2643	253	0.9334	253	0.7774	253	0.9628	253	0.7013	253	1.0489	253	0.9487	253	1.012	253	0.9291	253	0.8238
254	1.9435	254	1.1826	254	1.1718	254	0.9797	254	0.8707	254	1.0191	254	0.6431	254	1.1001	254	0.9833	254	1.0467	254	0.9869	254	0.889
255	1.9815	255	1.2998	255	1.2702	255	0.9217	255	0.8124	255	0.9426	255	0.6174	255	1.119	255	0.9113	255	0.8761	255	0.8727	255	0.794
256	2.2728	256	1.4574	256	1.45	256	1.1226	256	0.9535	256	1.028	256	0.6296	256	1.3099	256	1.1086	256	0.8398	256	0.847	256	0.8056
257	2.4	257	1.4675	257	1.4703	257	0.7962	257	0.8298	257	0.9182	257	0.6121	257	1.0317	257	0.864	257	0.7609	257	0.7601	257	0.7219
258	2.3115	258	1.5084	258	1.4798	258	0.7324	258	0.7777	258	0.9056	258	0.639	258	0.9524	258	0.8228	258	0.7107	258	0.6809	258	0.6763
259	2.4824	259	1.7053	259	1.6774	259	0.7075	259	0.7441	259	0.9046	259	0.676	259	0.909	259	0.8195	259	0.7245	259	0.7065	259	0.7043
260	2.4062	260	1.7143	260	1.6567	260	0.75	260	0.775	260	0.9483	260	0.7839	260	0.9468	260	0.8922	260	0.7613	260	0.733	260	0.751
261	2.5341	261	1.9637	261	1.8391	261	0.7049	261	0.736	261	0.9129	261	0.8283	261	0.9181	261	0.8694	261	0.77	261	0.7538	261	0.7635
262	2.2721	262	1.7177	262	1.6332	262	0.6312	262	0.6684	262	0.8429	262	0.7343	262	0.8113	262	0.7438	262	0.7042	262	0.7129	262	0.6918
263	2.1287	263	1.5728	263	1.4735	263	0.6621	263	0.6867	263	0.8593	263	0.753	263	0.8362	263	0.7733	263	0.7223	263	0.7192	263	0.7164
264	2.0836	264	1.5917	264	1.4182	264	0.6845	264	0.7103	264	0.8881	264	0.8625	264	0.8844	264	0.8656	264	0.8004	264	0.8134	264	0.8208
265	2.124	265	1.6015	265	1.4132	265	0.6325	265	0.6634	265	0.852	265	0.8695	265	0.8347	265	0.8195	265	0.762	265	0.7847	265	0.7849
266	2.0913	266	1.606	266	1.4165	266	0.5868	266	0.6244	266	0.8222	266	0.8184	266	0.7961	266	0.7696	266	0.7706	266	0.7489	266	0.7516
267	1.8867	267	1.4068	267	1.2785	267	0.6611	267	0.6822	267	0.8714	267	0.8929	267	0.8692	267	0.8764	267	0.8726	267	0.7985	267	0.8351
268	1.8583	268	1.2977	268	1.1993	268	0.7041	268	0.734	268	0.9141	268	1.0709	268	0.9574	268	0.9829	268	1.1462	268	0.9974	268	1.049
269	1.9648	269	1.3929	269	1.2564	269	0.651	269	0.7164	269	0.9034	269	1.0945	269	0.9362	269	0.9559	269	1.717	269	1.2219	269	1.1595
270	1.8493	270	1.3351	270	1.2272	270	0.6347	270	0.7228	270	0.9107	270	1.1313	270	0.9423	270	0.9786	270	3.7717	270	1.898	270	1.4285
271	1.6633	271	1.1509	271	1.0747	271	0.7074	271	0.801	271	0.9055	271	1.271	271	0.9984	271	1.101	271	1.3081	271	1.21	271	1.2932
272	1.8036	272	1.1874	272	1.1049	272	0.7598	272	0.8712	272	0.9329	272	1.3357	272	1.0595	272	1.1995	272	1.0915	272	1.0015	272	1.0542
273	1.8837	273	1.2702	273	1.1919	273	0.7291	273	0.8483	273	0.9281	273	1.3018	273	1.0524	273	1.1956	273	1.0503	273	0.9324	273	0.9385
274	1.6492	274	1.1233	274	1.0734	274	0.7388	274	0.8394	274	0.9461	274	1.3323	274	1.1078	274	1.2818	274	1.0504	274	0.9062	274	0.8884
275	1.5591	275	1.0038	275	0.9544	275	0.8248	275	0.9117	275	1.0045	275	1.4765	275	1.207	275	1.4399	275	1.04	275	0.885	275	0.8665
276	1.7077	276	1.0968	276	1.0414	276	0.8787	276	0.9769	276	1.0245	276	1.5454	276	1.2546	276	1.512	276	1.0822	276	0.9046	276	0.9017
277	1.6485	277	1.0987	277	1.0875	277	0.8473	277	0.9682	277	1.0152	277	1.5039	277	1.2759	277	1.5344	277	0.9894	277	0.8204	277	0.8529
278	1.4427	278	0.9426	278	0.9638	278	0.8992	278	1.0026	278	1.0944	278	1.5944	278	1.369	278	1.6543	278	0.9282	278	0.7962	278	0.8106
279	1.529	279	0.9117	279	0.8781	279	1.0394	279	1.131	279	1.1947	279	1.7522	279	1.5029	279	1.826	279	0.9864	279	0.8656	279	0.8682
280	1.6793	280	0.9879	280	0.9544	280	1.084	280	1.196	280	1.1805	280	1.7938	280	1.5748	280	1.8752	280	0.9973	280	0.871	280	0.8993
281	1.5386	281	0.9214	281	0.9616	281	1.0601	281	1.1777	281	1.2013	281	1.7935	281	1.6196	281	1.9008	281	0.9369	281	0.8161	281	0.85
282	1.4034	282	0.82	282	0.808	282	1.1753	282	1.2772	282	1.34	282	1.9553	282	1.7909	282	2.06	282	0.9668	282	0.8371	282	0.8415
283	1.6227	283	0.913	283	0.8551	283	1.3254	283	1.428	283	1.3975	283	2.0937	283	1.9283	283	2.2102	283	1.0887	283	1.0243	283	0.9508
284	1.7053	284	0.978	284	0.9637	284	1.3527	284	1.4765	284	1.3843	284	2.0782	284	1.9819	284	2.214	284	1.1554	284	1.0533	284	1.0111
285	1.4651	285	0.8733	285	0.8451	285	1.408	285	1.5115	285	1.4878	285	2.123	285	2.102	285	2.273	285	1.1149	285	0.9693	285	1.0493
286	1.5333	286	0.892	286	0.8179	286	1.6118	286	1.6919	286	1.6491	286	2.3238	286	2.3018	286	2.4611	286	1.1449	286	1.0594	286	1.0874
287	1.7547	287	1.0137	287	0.9373	287	1.7414	287	1.8648	287	1.6861	287	2.4172	287	2.4246	287	2.5688	287	1.1596	287	1.1049	287	1.0907
288	1.6025	288	0.9316	288	0.9054	288	1.7535	288	1.9202	288	1.735	288	2.4143	288	2.5099	288	2.5747	288	1.3814	288	1.2936	288	1.3431
289	1.4526	289	0.876	289	0.8101	289	1.7408	289	1.9182	289	1.8477	289	2.4953	289	2.5307	289	2.6319	289	1.1495	289	1.0194	289	0.9702
290	1.6855	290	1.0184	290	0.9179	290	1.4799	290	1.6365	290	1.6703	290	2.279	290	2.2315	290	2.4114	290	1.0987	290	0.9407	290	0.8714
291	1.7446	291	1.0814	291	1.0131	291	1.4039	291	1.515	291	1.6538	291	2.1533	291	2.101	291	2.2555	291	1.0533	291	0.9208	291	0.8198
292	1.5254	292	1.0186	292	0.939	292	1.3159	292	1.4102	292	1.5283	292	2.0503	292	1.957	292	2.106	292	1.0842	292	0.9475	292	0.8599
293	1.6779	293	1.1467	293	1.0304	293	1.1831	293	1.2473	293	1.3469	293	1.8298	293	1.7512	293	1.9026	293	1.0527	293	0.9145	293	0.8128
294	2.0226	294	1.335	294	1.2081	294	1.1638	294	1.2221	294	1.2755	294	1.7702	294	1.7262	294	1.8595	294	0.9544	294	0.8169	294	0.737
295	2.1073	295	1.2911	295	1.1429	295	1.1262	295	1.2196	295	1.2195	295	1.6961	295	1.6826	295	1.8072	295	0.9568	295	0.807	295	0.7659
296	2.3638	296	1.3768	296	1.2182	296	1.2309	296	1.3671	296	1.2257	296	1.8375	296	1.8075	296	1.9687	296	0.9879	296	0.8376	296	0.7773
297	2.2518	297	1.2986	297	1.1036	297	1.1066	297	1.2189	297	1.1485	297	1.7756	297	1.6622	297	1.8468	297	0.9245	297	0.7909	297	0.7196
298	2.112	298	1.1852	298	1.0108	298	0.9947	298	1.1036	298	1.0525	298	1.6273	298	1.4887	298	1.6498	298	0.8575	298	0.7216	298	0.6705
299	1.8528	299	1.0683	299	0.902	299	1.1151	299	1.2565	299	1.0524	299	1.7388	299	1.642	299	1.7796	299	0.898	299	0.7639	299	0.7268
300	1.7457	300	1.0119	300	0.8647	300	1.1918	300	1.3339	300	1.0457	300	1.775	300	1.6673	300	1.9026	300	0.9223	300	0.8148	300	0.7784
301	1.556	301	0.9506	301	0.8049	301	1.0919	301	1.2139	301	1.024	301	1.6404	301	1.4984	301	1.758	301	0.8428	301	0.7619	301	0.7067
302	1.3894	302	0.8694	302	0.7339	302	1.1048	302	1.2606	302	1.0163	302	1.5698	302	1.4413	302	1.6654	302	0.803	302	0.7132	302	0.688
303	1.3523	303	0.8497	303	0.7264	303	1.3826	303	1.6052	303	1.0583	303	1.7864	303	1.6976	303	2.0164	303	0.8422	303	0.7652	303	0.7646
304	1.403	304	0.8896	304	0.7901	304	1.5278	304	1.7599	304	1.1466	304	2.1339	304	1.8775	304	2.115	304	0.8467	304	0.8409	304	0.7749
305	1.2632	305	0.7849	305	0.7166	305	1.7583	305	2.1176	305	1.4125	305	2.5622	305	2.16	305	2.3186	305	0.7747	305	0.7656	305	0.7112
306	1.1785	306	0.7744	306	0.7292	306	1.2282	306	1.1568	306	1.4076	306	1.2675	306	1.5332	306	1.5079	306	0.7655	306	0.694	306	0.699
307	1.2612	307	0.8433	307	0.836	307	1.0432	307	0.9245	307	1.2017	307	1.0364	307	1.2587	307	1.194	307	0.8084	307	0.7281	307	0.7219
308	1.4881	308	0.9332	308	0.9175	308	0.9908	308	0.8877	308	1.168	308	1.0378	308	1.2057	308	1.1729	308	0.7811	308	0.7389	308	0.7193
309	1.6518	309	0.9964	309	0.9337	309	1.0107	309	0.9057	309	1.1904	309	1.1131	309	1.2285	309	1.2071	309	0.7019	309	0.6813	309	0.6547
310	2.5566	310	1.4326	310	1.3248	310	1.0101	310	0.9691	310	1.2154	310	1.2155	310	1.2933	310	1.3144	310	0.7266	310	0.7044	310	0.6687
311	2.5904	311	2.0241	311	1.5991	311	1.0563	311	1.0217	311	1.2228	311	1.3277	311	1.331	311	1.3749	311	0.81	311	0.7867	311	0.7218
312	1.3363	312	1.2874	312	1.2741	312	0.9325	312	0.9354	312	1.1024	312	1.3118	312	1.2193	312	1.2689	312	0.765	312	0.7354	312	0.6877
313	1.0491	313	0.9638	313	0.9883	313	0.8699	313	0.893	313	1.0686	313	1.3123	313	1.2254	313	1.2849	313	0.7197	313	0.7475	313	0.657
314	0.9651	314	0.8876	314	0.9051	314	0.9696	314	1.0098	314	1.1754	314	1.4456	314	1.3622	314	1.4566	314	0.8096	314	0.8272	314	0.7126
315	0.9562	315	0.8721	315	0.8844	315	0.9798	315	1.0262	315	1.1655	315	1.5643	315	1.3413	315	1.4817	315	0.825	315	0.8292	315	0.7337
316	0.9463	316	0.8683	316	0.8561	316	0.8739	316	0.9391	316	1.0648	316	1.5386	316	1.2648	316	1.4372	316	0.7627	316	0.8117	316	0.6933
317	0.9699	317	0.903	317	0.8906	317	0.9303	317	0.9954	317	1.1473	317	1.6363	317	1.3894	317	1.6062	317	0.8308	317	0.8996	317	0.7204
318	0.8775	318	0.8317	318	0.8094	318	1.0623	318	1.1121	318	1.2857	318	1.8884	318	1.5354	318	1.8128	318	0.9237	318	0.9682	318	0.7684
319	0.8115	319	0.7755	319	0.7204	319	1.0789	319	1.1318	319	1.2749	319	1.8748	319	1.5604	319	1.9418	319	0.9071	319	0.97	319	0.7706
320	0.866	320	0.8371	320	0.7713	320	1.0805	320	1.1389	320	1.2855	320	1.9504	320	1.6685	320	2.0457	320	0.9643	320	1.0551	320	0.8472
321	0.8858	321	0.8688	321	0.8213	321	1.2284	321	1.263	321	1.4214	321	2.139	321	1.8145	321	2.139	321	1.0508	321	1.1536	321	0.9375
322	0.835	322	0.7996	322	0.7483	322	1.2304	322	1.302	322	1.4364	322	2.1262	322	1.7983	322	2.0619	322	0.9346	322	1.0321	322	0.8437
323	0.8627	323	0.7932	323	0.7394	323	1.4927	323	1.592	323	1.6018	323	2.2966	323	2.0385	323	2.1554	323	0.9188	323	0.9899	323	0.8445
324	0.9832	324	0.91	324	0.8755	324	1.3142	324	1.3567	324	1.473	324	1.9805	324	1.8303	324	1.9829	324	0.8185	324	0.9342	324	0.773
325	1.0319	325	0.9798	325	0.9375	325	1.2155	325	1.2706	325	1.3856	325	1.741	325	1.7109	325	1.8288	325	0.7496	325	0.8618	325	0.7193
326	1.0268	326	0.9208	326	0.8957	326	1.1708	326	1.2099	326	1.3391	326	1.6257	326	1.6771	326	1.7494	326	0.7017	326	0.828	326	0.7035
327	1.1318	327	0.9969	327	0.9893	327	1.176	327	1.2027	327	1.3439	327	1.5265	327	1.6359	327	1.6606	327	0.6928	327	0.7774	327	0.7001
328	1.0935	328	0.9664	328	0.9229	328	1.0961	328	1.1665	328	1.2841	328	1.5161	328	1.6086	328	1.6603	328	0.7019	328	0.7929	328	0.6932
329	1.283	329	1.14	329	1.0764	329	0.9712	329	1.0241	329	1.1608	329	1.4531	329	1.463	329	1.5532	329	0.6628	329	0.7488	329	0.6513
330	1.1058	330	0.9559	330	0.8779	330	0.9314	330	0.9606	330	1.1301	330	1.3256	330	1.3456	330	1.4165	330	0.6517	330	0.7214	330	0.6564
331	1.013	331	0.8919	331	0.8085	331	0.9442	331	0.9589	331	1.1527	331	1.2789	331	1.3614	331	1.4008	331	0.7033	331	0.7741	331	0.7136
332	0.9582	332	0.8625	332	0.7588	332	0.8625	332	0.9169	332	1.0655	332	1.2951	332	1.3179	332	1.3882	332	0.6855	332	0.7197	332	0.6411
333	0.9665	333	0.9072	333	0.7997	333	0.7406	333	0.8152	333	0.9593	333	1.1992	333	1.1641	333	1.2488	333	0.7229	333	0.7446	333	0.6655
334	0.9573	334	0.8705	334	0.7581	334	0.7596	334	0.8135	334	0.9967	334	1.0889	334	1.1419	334	1.1735	334	0.8645	334	0.8582	334	0.8344
335	0.8532	335	0.7612	335	0.659	335	0.7831	335	0.851	335	1.0235	335	1.135	335	1.1842	335	1.224	335	1.0946	335	1.1234	335	1.2232
336	0.8127	336	0.7623	336	0.6674	336	0.7037	336	0.799	336	0.9216	336	1.1298	336	1.0833	336	1.1576	336	1.699	336	1.3606	336	1.8752
337	0.854	337	0.7999	337	0.7046	337	0.637	337	0.7182	337	0.8696	337	1.002	337	0.9682	337	1.0043	337	2.5295	337	2.4005	337	3.0048
338	0.8182	338	0.7364	338	0.6563	338	0.6628	338	0.7136	338	0.9078	338	0.9225	338	0.9909	338	0.9818	338	1.4206	338	1.1607	338	1.3049
339	0.7268	339	0.6597	339	0.5956	339	0.6883	339	0.7467	339	0.8956	339	1.02	339	1.0237	339	0.9991	339	1.1075	339	0.8939	339	1.0387
340	0.7675	340	0.7149	340	0.6589	340	0.6259	340	0.7134	340	0.8511	340	1.0038	340	0.9262	340	0.9094	340	1.036	340	0.8553	340	0.9862
341	0.8407	341	0.754	341	0.6965	341	0.5972	341	0.6711	341	0.8386	341	0.838	341	0.855	341	0.7913	341	1.0107	341	0.8595	341	0.9716
342	0.7777	342	0.678	342	0.6396	342	0.6383	342	0.6871	342	0.8476	342	0.8127	342	0.8975	342	0.801	342	0.9348	342	0.8395	342	0.9282
343	0.6947	343	0.6376	343	0.5999	343	0.6397	343	0.7044	343	0.8494	343	0.9158	343	0.8912	343	0.8015	343	0.9507	343	0.8864	343	0.9503
344	0.749	344	0.6875	344	0.6581	344	0.5823	344	0.633	344	0.8117	344	0.8543	344	0.7774	344	0.693	344	0.8988	344	0.8642	344	0.8821
345	0.8182	345	0.7299	345	0.7089	345	0.6085	345	0.6396	345	0.8118	345	0.759	345	0.7948	345	0.6765	345	0.8263	345	0.8109	345	0.8243
346	0.7639	346	0.6681	346	0.6472	346	0.7082	346	0.7138	346	0.8728	346	0.8877	346	0.9102	346	0.7826	346	0.8536	346	0.8788	346	0.8642
347	0.7033	347	0.6277	347	0.6053	347	0.6808	347	0.6741	347	0.8404	347	0.9061	347	0.8521	347	0.7356	347	0.8825	347	0.9805	347	0.8683
348	0.7965	348	0.6759	348	0.6454	348	0.6239	348	0.6458	348	0.8192	348	0.7697	348	0.8001	348	0.6712	348	0.8447	348	0.9294	348	0.8151
349	0.8599	349	0.7048	349	0.6716	349	0.6736	349	0.7022	349	0.8271	349	0.7934	349	0.8854	349	0.7378	349	0.8269	349	0.906	349	0.7889
350	0.807	350	0.6413	350	0.616	350	0.6964	350	0.7061	350	0.8085	350	0.883	350	0.9149	350	0.7678	350	0.9106	350	1.1503	350	0.8599
351	0.8126	351	0.6605	351	0.6434	351	0.6558	351	0.6655	351	0.8242	351	0.8107	351	0.8788	351	0.7298	351	0.9886	351	1.2787	351	0.9361
352	0.9589	352	0.7833	352	0.7384	352	0.6874	352	0.6882	352	0.8454	352	0.8512	352	0.9295	352	0.7645	352	0.9796	352	1.1744	352	0.8832
353	0.9568	353	0.7707	353	0.6807	353	0.7555	353	0.7496	353	0.8456	353	0.9638	353	1.0248	353	0.8478	353	1.0022	353	1.3033	353	0.9594
354	0.9227	354	0.7182	354	0.6591	354	0.7625	354	0.7613	354	0.8705	354	0.9376	354	1.0349	354	0.8598	354	0.9344	354	1.3223	354	1.003
355	1.0288	355	0.7705	355	0.7205	355	0.8325	355	0.8377	355	0.9853	355	1.0345	355	1.1021	355	0.9408	355	1.0255	355	1.5126	355	1.288
356	1.1673	356	0.7875	356	0.7151	356	0.923	356	0.9289	356	1.0396	356	1.1443	356	1.2108	356	1.0423	356	0.8788	356	1.0352	356	0.8581
357	1.2167	357	0.7545	357	0.6825	357	0.8301	357	0.8491	357	0.9488	357	0.9683	357	1.0931	357	0.9432	357	0.8004	357	0.8482	357	0.7701
358	1.3235	358	0.8159	358	0.7398	358	0.8496	358	0.8794	358	0.9685	358	0.9111	358	1.0889	358	0.9549	358	0.7462	358	0.7786	358	0.7388
359	1.5308	359	0.9079	359	0.8087	359	0.7464	359	0.7861	359	0.9027	359	0.732	359	0.9779	359	0.8428	359	0.7784	359	0.7485	359	0.7703
360	1.7217	360	0.9191	360	0.8233	360	0.693	360	0.7178	360	0.8495	360	0.6689	360	0.8861	360	0.7503	360	0.7452	360	0.7277	360	0.7472
361	1.7316	361	1.0203	361	1.0222	361	0.6543	361	0.672	361	0.8392	361	0.736	361	0.8414	361	0.7416	361	0.6977	361	0.7004	361	0.6985
362	1.6499	362	1.1215	362	1.1821	362	0.6499	362	0.6618	362	0.875	362	0.8275	362	0.8483	362	0.7728	362	0.7331	362	0.6917	362	0.7252
363	1.2628	363	0.9959	363	1.0274	363	0.6497	363	0.6606	363	0.893	363	0.8745	363	0.8886	363	0.7679	363	0.7467	363	0.6588	363	0.7372
364	1.1571	364	0.9921	364	1.0686	364	0.5969	364	0.618	364	0.8137	364	0.8139	364	0.806	364	0.6797	364	0.7028	364	0.6393	364	0.6946
365	1.0823	365	0.8744	365	0.951	365	0.6023	365	0.6238	365	0.8283	365	0.8764	365	0.7996	365	0.7027	365	0.6957	365	0.6385	365	0.6619
366	0.988	366	0.7721	366	0.8035	366	0.6464	366	0.6628	366	0.8979	366	1.0201	366	0.8923	366	0.8071	366	0.7695	366	0.6465	366	0.704
367	0.9631	367	0.7513	367	0.7466	367	0.6009	367	0.6334	367	0.8474	367	0.9796	367	0.8217	367	0.7533	367	0.7806	367	0.6306	367	0.7268
368	0.9884	368	0.7765	368	0.7431	368	0.6117	368	0.6568	368	0.832	368	0.9587	368	0.7952	368	0.7613	368	0.7277	368	0.625	368	0.6956
369	1.111	369	0.8039	369	0.7623	369	0.6984	369	0.7338	369	0.8933	369	1.1223	369	0.8718	369	0.8842	369	0.747	369	0.6374	369	0.6809
370	0.9848	370	0.714	370	0.6699	370	0.7642	370	0.776	370	1.0319	370	1.322	370	1.0117	370	0.9939	370	0.7834	370	0.6207	370	0.7258
371	0.97	371	0.7213	371	0.675	371	0.7226	371	0.8314	371	1.0373	371	1.3301	371	1.0153	371	1.0704	371	0.7871	371	0.6282	371	0.7899
372	1.2035	372	0.7971	372	0.8147	372	0.7491	372	0.8851	372	1.4017	372	1.5578	372	1.1548	372	1.8704	372	0.7885	372	0.6508	372	0.7534
373	1.1435	373	0.7415	373	0.7955	373	1.0061	373	1.3923	373	1.8982	373	1.84	373	1.5142	373	2.4806	373	0.8035	373	0.6452	373	0.7277
374	1.1241	374	0.7523	374	0.7733	374	1.2764	374	1.2343	374	1.1401	374	1.1404	374	1.5652	374	1.406	374	0.8333	374	0.652	374	0.7547
375	1.4669	375	0.799	375	0.8936	375	0.9603	375	1.0034	375	0.8628	375	0.8689	375	1.3392	375	1.1405	375	0.8363	375	0.6577	375	0.7437
376	1.7226	376	1.0083	376	1.2069	376	0.8924	376	0.9414	376	0.8248	376	0.8315	376	1.2164	376	1.0563	376	0.811	376	0.6404	376	0.6876
377	1.6621	377	1.1489	377	1.5357	377	0.8847	377	0.9363	377	0.8242	377	0.8345	377	1.1985	377	1.0648	377	0.8344	377	0.6721	377	0.7149
378	1.7132	378	1.2125	378	2.1028	378	0.8572	378	0.9315	378	0.832	378	0.852	378	1.1937	378	1.0814	378	0.9046	378	0.7228	378	0.7812
379	2.0068	379	1.915	379	3.778	379	0.8944	379	0.9651	379	0.8964	379	0.9269	379	1.2456	379	1.1373	379	0.8646	379	0.691	379	0.7264
380	1.3743	380	1.3001	380	1.2715	380	0.8508	380	0.9201	380	0.8506	380	0.8829	380	1.1859	380	1.0557	380	0.8582	380	0.7046	380	0.6947
381	1.0405	381	0.9953	381	0.9625	381	0.7889	381	0.8862	381	0.8059	381	0.8602	381	1.1068	381	0.9691	381	0.9084	381	0.7583	381	0.7604
382	0.954	382	0.9043	382	0.8712	382	0.8393	382	0.944	382	0.8906	382	0.9383	382	1.1674	382	1.0574	382	0.9093	382	0.7507	382	0.7495
383	0.9513	383	0.8986	383	0.8497	383	0.8841	383	0.9825	383	0.9508	383	0.9996	383	1.2279	383	1.116	383	0.8815	383	0.742	383	0.6955
384	0.9044	384	0.8664	384	0.8253	384	0.8408	384	0.9237	384	0.9075	384	0.9666	384	1.1518	384	1.0231	384	0.9373	384	0.8141	384	0.7629
385	0.9554	385	0.9063	385	0.8753	385	0.855	385	0.9313	385	0.9194	385	1.0133	385	1.1408	385	1.041	385	0.9785	385	0.858	385	0.8384
386	0.8525	386	0.8196	386	0.7837	386	1.0336	386	1.0722	386	1.0903	386	1.1452	386	1.3133	386	1.2711	386	0.9561	386	0.8453	386	0.8221
387	0.7851	387	0.7472	387	0.7233	387	1.0938	387	1.1244	387	1.1646	387	1.204	387	1.4136	387	1.3515	387	1.059	387	0.9359	387	0.9013
388	0.8663	388	0.8039	388	0.8131	388	1.0186	388	1.0455	388	1.1145	388	1.2601	388	1.4116	388	1.3335	388	1.1699	388	1.0383	388	1.0176
389	0.8936	389	0.8454	389	0.8319	389	1.1187	389	1.1252	389	1.2347	389	1.3899	389	1.4521	389	1.396	389	1.0921	389	0.9764	389	0.9254
390	0.8265	390	0.7703	390	0.7552	390	1.1219	390	1.0901	390	1.121	390	1.3355	390	1.3665	390	1.3519	390	1.1295	390	1.0081	390	0.942
391	0.8652	391	0.7677	391	0.7774	391	1.37	391	1.2203	391	1.2372	391	1.5652	391	1.5162	391	1.5238	391	1.0592	391	0.952	391	0.8473
392	1.044	392	0.9494	392	0.9722	392	1.0349	392	1.0182	392	1.0681	392	1.2322	392	1.2352	392	1.1696	392	1.0039	392	0.8769	392	0.7824
393	1.1387	393	1.0216	393	1.0466	393	0.9268	393	0.9549	393	0.9852	393	1.0701	393	1.1501	393	1.0551	393	0.9787	393	0.8508	393	0.7347
394	1.1483	394	0.9156	394	0.9531	394	0.8442	394	0.9124	394	0.9227	394	0.9888	394	1.0972	394	0.9784	394	0.996	394	0.8488	394	0.7191
395	1.231	395	1.017	395	1.0409	395	0.8551	395	0.9167	395	0.9029	395	0.9631	395	1.1492	395	1.0152	395	0.9905	395	0.8382	395	0.7058
396	1.1936	396	0.9833	396	1.0236	396	0.8269	396	0.8793	396	0.8894	396	0.9461	396	1.089	396	0.9429	396	0.9125	396	0.7398	396	0.6499
397	1.3278	397	1.1152	397	1.1779	397	0.7359	397	0.8232	397	0.7903	397	0.8803	397	0.9973	397	0.8487	397	0.9061	397	0.7099	397	0.6507
398	1.143	398	0.9063	398	0.9462	398	0.7255	398	0.8246	398	0.7459	398	0.8334	398	1.0379	398	0.8764	398	1.0808	398	0.7949	398	0.7016
399	1.0508	399	0.8224	399	0.858	399	0.7337	399	0.83	399	0.7501	399	0.8274	399	1.068	399	0.8948	399	1.052	399	0.7487	399	0.6763
400	0.9482	400	0.774	400	0.8063	400	0.6881	400	0.7891	400	0.7303	400	0.8233	400	1.0036	400	0.8207	400	0.9339	400	0.7173	400	0.6995
401	0.9699	401	0.7971	401	0.8311	401	0.6497	401	0.7586	401	0.6745	401	0.7628	401	0.9853	401	0.7766	401	1.0392	401	0.824	401	0.8362
402	0.9656	402	0.7787	402	0.7973	402	0.6903	402	0.7883	402	0.6824	402	0.7353	402	1.0602	402	0.8385	402	1.2506	402	0.9767	402	0.9409
403	0.8492	403	0.6989	403	0.6948	403	0.7169	403	0.8082	403	0.7514	403	0.7607	403	1.0809	403	0.8525	403	1.5244	403	1.0505	403	1.1281
404	0.8083	404	0.6949	404	0.6965	404	0.6994	404	0.7751	404	0.7635	404	0.7432	404	1.043	404	0.7741	404	1.9184	404	1.4856	404	1.5035
405	0.8662	405	0.7141	405	0.7291	405	0.7067	405	0.7685	405	0.7006	405	0.6872	405	1.0251	405	0.749	405	1.0831	405	1.6771	405	1.2591
406	0.8493	406	0.6881	406	0.673	406	0.7532	406	0.7892	406	0.6757	406	0.6759	406	1.0399	406	0.8005	406	0.8801	406	1.3489	406	1.0591
407	0.7728	407	0.6372	407	0.5965	407	0.7879	407	0.8363	407	0.7255	407	0.707	407	1.0014	407	0.8179	407	0.84	407	1.2747	407	1.0196
408	0.7879	408	0.6729	408	0.6537	408	0.7532	408	0.8102	408	0.7153	408	0.6786	408	0.9673	408	0.7795	408	0.8389	408	1.2554	408	1.048
409	0.885	409	0.7237	409	0.7201	409	0.7279	409	0.7442	409	0.6628	409	0.6297	409	0.9978	409	0.7691	409	0.8325	409	1.2564	409	1.0799
410	0.8881	410	0.683	410	0.6556	410	0.718	410	0.778	410	0.6835	410	0.6587	410	1.0035	410	0.8025	410	0.8659	410	1.2136	410	1.1009
411	0.8047	411	0.6384	411	0.6048	411	0.7155	411	0.8096	411	0.7241	411	0.6813	411	0.9713	411	0.8056	411	0.8062	411	1.0381	411	0.9806
412	0.8126	412	0.6951	412	0.7213	412	0.7052	412	0.7441	412	0.6924	412	0.6331	412	0.9629	412	0.7472	412	0.7652	412	0.9906	412	0.9406
413	0.8888	413	0.7376	413	0.8034	413	0.7339	413	0.7368	413	0.6911	413	0.6475	413	1.0199	413	0.7845	413	0.8343	413	1.136	413	1.0225
414	0.8279	414	0.6593	414	0.6997	414	0.7674	414	0.8301	414	0.7847	414	0.7245	414	1.0562	414	0.8908	414	0.8761	414	1.0923	414	0.9964
415	0.7699	415	0.641	415	0.6463	415	0.7211	415	0.7882	415	0.7614	415	0.6958	415	1.0099	415	0.7999	415	0.8242	415	0.9696	415	0.9458
416	0.8261	416	0.687	416	0.7039	416	0.722	416	0.7207	416	0.7091	416	0.6742	416	1.0229	416	0.7741	416	0.834	416	1.0415	416	0.9489
417	0.8783	417	0.6899	417	0.7263	417	0.7358	417	0.7342	417	0.744	417	0.7111	417	1.0566	417	0.8332	417	1.0194	417	1.2147	417	1.0632
418	0.8123	418	0.6406	418	0.6386	418	0.6989	418	0.7181	418	0.7588	418	0.7367	418	1.0044	418	0.807	418	1.123	418	1.1898	418	1.146
419	0.8321	419	0.6714	419	0.6412	419	0.6867	419	0.6893	419	0.7469	419	0.7431	419	0.9891	419	0.7729	419	1.1367	419	1.1194	419	1.0255
420	0.934	420	0.7661	420	0.7574	420	0.7435	420	0.7242	420	0.8009	420	0.8068	420	1.0794	420	0.8437	420	1.1659	420	1.2749	420	1.0485
421	0.9367	421	0.7369	421	0.7305	421	0.7744	421	0.7563	421	0.8736	421	0.8827	421	1.1034	421	0.8955	421	1.0842	421	1.3314	421	1.0427
422	0.93	422	0.7104	422	0.6613	422	0.7698	422	0.7661	422	0.9031	422	0.914	422	1.0783	422	0.8777	422	1.179	422	1.621	422	1.1719
423	0.9935	423	0.7729	423	0.723	423	0.8681	423	0.8392	423	0.9408	423	1.0114	423	1.2072	423	0.9866	423	0.9108	423	1.3831	423	0.9797
424	1.0631	424	0.7845	424	0.761	424	0.9282	424	0.9071	424	1.0304	424	1.0954	424	1.2951	424	1.0887	424	0.8342	424	1.3273	424	0.9546
425	1.1012	425	0.7569	425	0.7151	425	0.8836	425	0.8399	425	0.92	425	0.9693	425	1.2535	425	1.0198	425	0.8031	425	1.2939	425	0.945
426	1.1735	426	0.809	426	0.7416	426	0.9341	426	0.871	426	0.9239	426	0.9636	426	1.3524	426	1.0689	426	0.8157	426	1.3099	426	0.9946
427	1.2439	427	0.8678	427	0.8328	427	0.9043	427	0.8116	427	0.8583	427	0.8855	427	1.3214	427	0.9942	427	0.7853	427	1.262	427	0.9587
428	1.2927	428	0.8895	428	0.8618	428	0.8443	428	0.7758	428	0.7957	428	0.8022	428	1.2403	428	0.9285	428	0.7272	428	1.1224	428	0.8835
429	1.4447	429	0.9898	429	0.9227	429	0.8276	429	0.7644	429	0.7986	429	0.8092	429	1.1999	429	0.8888	429	0.7228	429	1.0732	429	0.9066
430	1.4615	430	1.0699	430	1.0038	430	0.854	430	0.791	430	0.8474	430	0.8585	430	1.2029	430	0.9004	430	0.7294	430	1.1164	430	0.93
431	1.2273	431	0.9825	431	0.8812	431	0.8363	431	0.7831	431	0.8343	431	0.8766	431	1.1541	431	0.8797	431	0.6947	431	1.0435	431	0.8793
432	1.1199	432	1.0021	432	0.8836	432	0.7716	432	0.7261	432	0.7469	432	0.7329	432	1.0592	432	0.7805	432	0.6562	432	0.9072	432	0.847
433	1.0543	433	0.9054	433	0.7749	433	0.8037	433	0.7606	433	0.7817	433	0.7344	433	1.0797	433	0.7992	433	0.6828	433	0.9407	433	0.8743
434	0.9682	434	0.824	434	0.7046	434	0.8536	434	0.8165	434	0.904	434	0.9027	434	1.1207	434	0.8734	434	0.6858	434	1.0001	434	0.8762
435	0.9564	435	0.8162	435	0.678	435	0.7829	435	0.7579	435	0.8346	435	0.828	435	1.0357	435	0.825	435	0.6507	435	0.9117	435	0.8267
436	0.9605	436	0.8454	436	0.714	436	0.885	436	0.8202	436	0.8149	436	0.794	436	1.056	436	0.8253	436	0.6353	436	0.8237	436	0.7795
437	1.0159	437	0.8743	437	0.75	437	0.8015	437	0.8949	437	0.9404	437	0.9541	437	1.2439	437	1.0621	437	0.6288	437	0.9055	437	0.8002
438	0.9241	438	0.7567	438	0.6686	438	0.8741	438	1.0229	438	1.2573	438	1.392	438	1.5258	438	1.1998	438	0.6684	438	0.9777	438	0.8421
439	0.8678	439	0.7388	439	0.6762	439	0.8045	439	1.0857	439	1.6009	439	1.9931	439	1.7458	439	2.8825	439	0.6652	439	0.8238	439	0.7672
440	0.9886	440	0.8647	440	0.8346	440	0.872	440	1.1518	440	1.9351	440	2.8769	440	2.7298	440	4.2667	440	0.6288	440	0.8133	440	0.7093
441	0.9954	441	0.8062	441	0.8248	441	1.3625	441	1.8147	441	2.6743	441	4.3224	441	3.7298	441	6.8446	441	0.6261	441	0.8829	441	0.7386
442	0.9365	442	0.7293	442	0.7548	442	1.4189	442	1.2913	442	1.3399	442	1.2129	442	1.6505	442	1.4993	442	0.663	442	0.8307	442	0.7613
443	1.0238	443	0.8111	443	0.8686	443	1.1055	443	1.0405	443	1.0549	443	0.9641	443	1.4131	443	1.2411	443	0.6247	443	0.7749	443	0.6764
444	1.2152	444	0.9723	444	1.1396	444	0.9831	444	0.9589	444	1.0045	444	0.8732	444	1.3131	444	1.0923	444	0.6183	444	0.8532	444	0.6688
445	1.2642	445	1.0712	445	1.5911	445	0.9456	445	0.9246	445	0.985	445	0.8159	445	1.3022	445	1.0608	445	0.6661	445	0.9502	445	0.783
446	1.5197	446	1.5886	446	3.6893	446	0.9605	446	0.8773	446	0.9906	446	0.8029	446	1.3152	446	1.0562	446	0.6471	446	0.8754	446	0.7137
447	2.7109	447	1.5687	447	1.5264	447	0.9932	447	0.89	447	0.9706	447	0.8185	447	1.3382	447	1.0749	447	0.6427	447	0.845	447	0.6746
448	2.5123	448	1.3775	448	1.2547	448	0.8854	448	0.8408	448	0.8146	448	0.7388	448	1.246	448	0.9978	448	0.679	448	0.9252	448	0.6753
449	2.1973	449	1.3141	449	1.1639	449	0.8302	449	0.7963	449	0.7783	449	0.7172	449	1.1969	449	0.9269	449	0.6801	449	0.9039	449	0.6838
450	2.1112	450	1.3937	450	1.2026	450	0.9129	450	0.8306	450	0.8468	450	0.7774	450	1.2567	450	0.9783	450	0.6928	450	0.8776	450	0.6764
451	2.0392	451	1.4383	451	1.2389	451	0.9034	451	0.8417	451	0.8088	451	0.7957	451	1.2562	451	1.0051	451	0.7476	451	0.9716	451	0.7066
452	2.0759	452	1.5809	452	1.3399	452	0.7973	452	0.7965	452	0.7395	452	0.7563	452	1.1532	452	0.9303	452	0.7726	452	1.0116	452	0.7269
453	1.77	453	1.4459	453	1.2049	453	0.7991	453	0.795	453	0.7708	453	0.8089	453	1.1664	453	0.937	453	0.7844	453	0.9841	453	0.7392
454	1.5555	454	1.2675	454	1.0592	454	0.9298	454	0.8763	454	0.8775	454	0.9455	454	1.2881	454	1.0656	454	0.9262	454	1.1138	454	0.8225
455	1.7373	455	1.4372	455	1.1984	455	0.9946	455	0.9056	455	0.9721	455	1.0433	455	1.3248	455	1.1403	455	0.9981	455	1.2249	455	0.8928
456	1.7857	456	1.5504	456	1.2764	456	0.946	456	0.8879	456	0.9066	456	1.0484	456	1.3116	456	1.1088	456	0.8605	456	1.1494	456	0.7961
457	1.5335	457	1.3653	457	1.1335	457	1.02	457	0.9305	457	0.9562	457	1.074	457	1.4089	457	1.1645	457	0.8381	457	1.1541	457	0.7805
458	1.551	458	1.3513	458	1.1242	458	1.0094	458	0.882	458	0.949	458	1.0366	458	1.4104	458	1.1396	458	0.7942	458	1.063	458	0.7366
459	1.9587	459	1.6322	459	1.3491	459	1.1196	459	0.9268	459	1.0459	459	1.0944	459	1.5218	459	1.2268	459	0.7438	459	0.9372	459	0.6971
460	2.0282	460	1.693	460	1.4204	460	0.9506	460	0.8271	460	0.9101	460	0.9022	460	1.3637	460	1.0482	460	0.7439	460	0.8535	460	0.7046
461	1.8929	461	1.5346	461	1.3282	461	0.9355	461	0.8155	461	0.8894	461	0.8541	461	1.3331	461	1.0231	461	0.7704	461	0.806	461	0.7173
462	2.1005	462	1.6894	462	1.4349	462	0.918	462	0.7989	462	0.8927	462	0.8319	462	1.3182	462	1.007	462	0.7933	462	0.8309	462	0.7622
463	2.0783	463	1.6694	463	1.4095	463	0.9842	463	0.8374	463	0.961	463	0.8959	463	1.3747	463	1.0684	463	0.7057	463	0.8125	463	0.6903
464	2.3612	464	1.9019	464	1.6275	464	0.9526	464	0.8273	464	0.9419	464	0.8756	464	1.3264	464	1.0237	464	0.6942	464	0.7701	464	0.6873
465	2.0154	465	1.6157	465	1.3621	465	0.8533	465	0.7612	465	0.8076	465	0.7558	465	1.2055	465	0.9053	465	0.7887	465	0.806	465	0.756
466	1.9123	466	1.5132	466	1.2779	466	0.8356	466	0.7728	466	0.8373	466	0.7393	466	1.2199	466	0.9326	466	0.7247	466	0.763	466	0.6986
467	1.814	467	1.3956	467	1.1929	467	0.8598	467	0.8066	467	0.9216	467	0.7895	467	1.2581	467	0.9741	467	0.6856	467	0.7494	467	0.6874
468	1.9925	468	1.4302	468	1.243	468	0.8255	468	0.789	468	0.8699	468	0.7625	468	1.1855	468	0.8994	468	0.7596	468	0.7783	468	0.788
469	1.8094	469	1.2646	469	1.1229	469	0.7606	469	0.7488	469	0.7964	469	0.6923	469	1.1152	469	0.8377	469	0.8672	469	0.8825	469	0.9152
470	1.4758	470	1.088	470	0.959	470	0.7982	470	0.7798	470	0.8699	470	0.7095	470	1.1593	470	0.9039	470	0.8819	470	0.9487	470	1.0042
471	1.6193	471	1.14	471	0.994	471	0.8572	471	0.8364	471	0.9877	471	0.8192	471	1.2004	471	0.9458	471	1.1031	471	1.277	471	1.6255
472	1.8229	472	1.141	472	1.0252	472	0.7949	472	0.817	472	0.9625	472	0.8178	472	1.1405	472	0.909	472	1.2985	472	1.129	472	1.2119
473	1.6105	473	0.9701	473	0.9059	473	0.7313	473	0.7915	473	0.8404	473	0.7291	473	1.0675	473	0.8508	473	0.9706	473	0.9555	473	1.0436
474	1.4312	474	0.8786	474	0.8053	474	0.7537	474	0.8083	474	0.8227	474	0.7981	474	1.0774	474	0.8921	474	0.9095	474	0.9126	474	1.0086
475	1.7341	475	0.9837	475	0.9011	475	0.7866	475	0.8541	475	0.8934	475	0.8399	475	1.1008	475	0.9093	475	0.8798	475	0.9452	475	0.9981
476	1.9892	476	1.0079	476	0.9708	476	0.7229	476	0.8205	476	0.8648	476	0.7891	476	1.0266	476	0.8387	476	0.8254	476	0.9332	476	0.9566
477	1.813	477	0.9038	477	0.8775	477	0.6855	477	0.8035	477	0.8006	477	0.8038	477	1.001	477	0.8142	477	0.8228	477	1.0327	477	0.9641
478	1.7494	478	0.892	478	0.8384	478	0.7304	478	0.852	478	0.8698	478	0.9064	478	1.0873	478	0.8718	478	0.7472	478	1.0003	478	0.8858
479	2.1378	479	0.972	479	0.9466	479	0.7399	479	0.862	479	0.9052	479	0.9542	479	1.0993	479	0.8679	479	0.7131	479	0.8996	479	0.7844
480	2.3672	480	1.0504	480	1.0685	480	0.6929	480	0.7924	480	0.8399	480	0.9119	480	0.9468	480	0.7839	480	0.7357	480	0.9764	480	0.8081
481	2.2199	481	1.0012	481	1.0074	481	0.7243	481	0.8121	481	0.8516	481	0.9617	481	0.9547	481	0.8283	481	0.7223	481	1.0208	481	0.8498
482	2.3139	482	1.0184	482	1.0111	482	0.8155	482	0.9032	482	0.9882	482	1.1311	482	1.047	482	0.9091	482	0.6607	482	0.9491	482	0.8269
483	2.7568	483	1.1975	483	1.2036	483	0.7622	483	0.8715	483	0.9584	483	1.1064	483	0.972	483	0.8577	483	0.6476	483	0.9402	483	0.7621
484	2.8762	484	1.3044	484	1.3039	484	0.7066	484	0.8202	484	0.8905	484	1.0356	484	0.9031	484	0.8207	484	0.6875	484	1.0185	484	0.802
485	2.7784	485	1.2824	485	1.2692	485	0.7799	485	0.8862	485	0.9493	485	1.1058	485	0.9679	485	0.8977	485	0.6968	485	1.0777	485	0.8648
486	3.0016	486	1.3395	486	1.3414	486	0.7808	486	0.8797	486	0.9552	486	1.1516	486	0.9443	486	0.8871	486	0.6997	486	1.1174	486	0.9292
487	3.4705	487	1.5899	487	1.5955	487	0.7105	487	0.7992	487	0.9163	487	1.1278	487	0.8841	487	0.8479	487	0.7776	487	1.1693	487	0.9342
488	3.454	488	1.6914	488	1.6633	488	0.7722	488	0.8371	488	0.9661	488	1.1945	488	0.9408	488	0.9197	488	0.801	488	1.1156	488	0.8799
489	3.356	489	1.6197	489	1.5893	489	0.8457	489	0.8934	489	1.0025	489	1.2969	489	0.9994	489	0.9935	489	0.9897	489	1.2856	489	0.839
490	3.7064	490	1.7776	490	1.7544	490	0.8297	490	0.8541	490	0.9743	490	1.314	490	0.9641	490	0.9541	490	0.7982	490	1.0967	490	0.7328
491	4.0533	491	2.0238	491	1.9908	491	0.9202	491	0.9272	491	1.0691	491	1.3828	491	1.0439	491	1.0516	491	0.8025	491	0.9914	491	0.7136
492	3.9197	492	2.0264	492	1.9685	492	1.0209	492	1.0294	492	1.1609	492	1.4865	492	1.1677	492	1.1718	492	0.7848	492	0.8831	492	0.7098
493	3.9624	493	2.0239	493	1.9568	493	0.9519	493	0.9678	493	1.1036	493	1.3721	493	1.1153	493	1.1142	493	0.8129	493	0.8368	493	0.7841
494	4.4462	494	2.2831	494	2.2127	494	0.9927	494	1.0225	494	1.1198	494	1.3402	494	1.1898	494	1.1672	494	0.809	494	0.7825	494	0.7875
495	4.6071	495	2.4768	495	2.3905	495	0.8829	495	0.9338	495	1.006	495	1.2219	495	1.0889	495	1.0333	495	0.7305	495	0.7647	495	0.7046
496	4.4006	496	2.4319	496	2.3296	496	0.7997	496	0.8727	496	0.9292	496	1.0732	496	1.0132	496	0.9319	496	0.7251	496	0.7681	496	0.7352
497	4.4979	497	2.4268	497	2.3267	497	0.7469	497	0.823	497	0.8736	497	1.0297	497	0.9752	497	0.8606	497	0.7582	497	0.7136	497	0.7753
498	4.1345	498	2.1055	498	2.0302	498	0.7494	498	0.8198	498	0.8548	498	1.0098	498	0.9873	498	0.8568	498	0.7292	498	0.6784	498	0.7377
499	3.8746	499	1.8962	499	1.8401	499	0.7452	499	0.8171	499	0.9016	499	1.0839	499	0.9727	499	0.8705	499	0.6683	499	0.6823	499	0.6933
500	3.4584	500	1.7518	500	1.6778	500	0.6723	500	0.7806	500	0.8533	500	1.0206	500	0.9063	500	0.8039	500	0.7109	500	0.6987	500	0.7449
501	3.064	501	1.5777	501	1.4896	501	0.688	501	0.7862	501	0.8287	501	0.9783	501	0.9355	501	0.7957	501	0.7682	501	0.6905	501	0.774
502	2.8922	502	1.6258	502	1.5023	502	0.7841	502	0.8771	502	0.9306	502	1.0525	502	1.0338	502	0.8868	502	0.7106	502	0.6672	502	0.7308
503	2.7401	503	1.6853	503	1.5225	503	0.735	503	0.8543	503	0.9279	503	1.0142	503	1.0022	503	0.836	503	0.6744	503	0.7068	503	0.7242
504	3.0978	504	1.8637	504	1.7147	504	0.7052	504	0.8244	504	0.8956	504	0.9617	504	0.9835	504	0.82	504	0.7268	504	0.7446	504	0.7702
505	3.0536	505	1.6785	505	1.5913	505	0.7573	505	0.8606	505	0.9358	505	0.9979	505	1.1802	505	0.8686	505	0.8025	505	0.7508	505	0.7864
506	2.728	506	1.5161	506	1.4254	506	0.891	506	1.0111	506	1.1204	506	1.1621	506	1.6516	506	1.0028	506	0.7281	506	0.7386	506	0.7829
507	2.9112	507	1.78	507	1.6273	507	0.9744	507	1.1826	507	1.2136	507	1.2695	507	1.7661	507	1.2925	507	0.7086	507	0.7728	507	0.7932
508	3.2605	508	1.8725	508	1.7299	508	1.1597	508	1.9047	508	1.5147	508	1.7444	508	2.7329	508	2.4486	508	0.7753	508	0.7938	508	0.8014
509	3.12	509	1.635	509	1.5648	509	1.3045	509	1.166	509	1.3337	509	1.6757	509	1.4732	509	1.5101	509	0.7958	509	0.7778	509	0.7984
510	2.9609	510	1.6115	510	1.5608	510	0.9869	510	0.9164	510	1.0431	510	1.4519	510	1.2304	510	1.3049	510	0.7376	510	0.788	510	0.7729
511	3.505	511	1.9681	511	1.9059	511	0.9002	511	0.882	511	0.9437	511	1.3868	511	1.1415	511	1.2481	511	0.7682	511	0.8784	511	0.7984
512	3.7035	512	2.0361	512	2.2215	512	0.8703	512	0.8748	512	0.9274	512	1.4173	512	1.1281	512	1.2577	512	0.8876	512	0.9235	512	0.8383
513	3.5728	513	2.2093	513	3.2644	513	0.8502	513	0.8504	513	0.8861	513	1.4622	513	1.1166	513	1.2498	513	0.8225	513	0.8919	513	0.7753
514	2.1373	514	1.8703	514	1.7803	514	0.8814	514	0.8893	514	0.9035	514	1.5246	514	1.1676	514	1.3126	514	0.7522	514	0.9675	514	0.7627
515	1.8794	515	1.5826	515	1.4029	515	0.8026	515	0.8307	515	0.8532	515	1.4308	515	1.093	515	1.2534	515	0.7872	515	1.0623	515	0.7982
516	1.7992	516	1.4263	516	1.234	516	0.7539	516	0.7717	516	0.8451	516	1.3273	516	1.0019	516	1.1685	516	0.7801	516	1.0173	516	0.7775
517	2.0137	517	1.3965	517	1.2069	517	0.8651	517	0.8379	517	0.905	517	1.4	517	1.0788	517	1.2327	517	0.7394	517	1.0271	517	0.759
518	2.1647	518	1.3691	518	1.183	518	0.8708	518	0.8772	518	0.9557	518	1.4167	518	1.1376	518	1.2816	518	0.7943	518	1.1949	518	0.8315
519	2.472	519	1.3794	519	1.2213	519	0.7763	519	0.8105	519	0.9023	519	1.3173	519	1.0565	519	1.1775	519	0.8527	519	1.2576	519	0.8577
520	2.394	520	1.2464	520	1.1203	520	0.8093	520	0.8109	520	0.9361	520	1.3141	520	1.056	520	1.1658	520	0.8362	520	1.2434	520	0.8297
521	2.269	521	1.1458	521	1.0416	521	0.9334	521	0.947	521	1.1569	521	1.3897	521	1.2669	521	1.3356	521	0.9087	521	1.3432	521	0.9412
522	2.6163	522	1.2441	522	1.1668	522	0.9961	522	0.9964	522	1.208	522	1.4813	522	1.3609	522	1.4372	522	1.0125	522	1.4681	522	1.0379
523	2.8429	523	1.2802	523	1.2407	523	1.063	523	0.9482	523	1.1098	523	1.456	523	1.2942	523	1.3885	523	0.9269	523	1.3891	523	0.9518
524	2.7033	524	1.1855	524	1.1686	524	1.0606	524	1.0099	524	1.207	524	1.521	524	1.3708	524	1.4066	524	0.9421	524	1.4103	524	0.9791
525	2.9418	525	1.2796	525	1.2641	525	0.9957	525	0.9887	525	1.2098	525	1.5021	525	1.3524	525	1.3783	525	0.843	525	1.3362	525	0.94
526	3.3438	526	1.472	526	1.4776	526	1.1207	526	1.1245	526	1.4005	526	1.5578	526	1.4085	526	1.4596	526	0.7785	526	1.2293	526	0.8867
527	3.4425	527	1.5189	527	1.5923	527	0.9341	527	0.9233	527	1.1089	527	1.4312	527	1.1347	527	1.216	527	0.7569	527	1.1748	527	0.8623
528	3.5341	528	1.5715	528	1.5986	528	0.8677	528	0.8482	528	0.9778	528	1.408	528	1.0453	528	1.1632	528	0.7684	528	1.153	528	0.871
529	3.7748	529	1.7378	529	1.7108	529	0.8193	529	0.7969	529	0.8978	529	1.3752	529	0.9876	529	1.1177	529	0.7777	529	1.1073	529	0.8437
530	3.6526	530	1.6653	530	1.6341	530	0.8586	530	0.81	530	0.9174	530	1.4056	530	1.0041	530	1.1531	530	0.7291	530	0.9932	530	0.7848
531	3.7867	531	1.773	531	1.7155	531	0.8288	531	0.7747	531	0.8547	531	1.3418	531	0.9407	531	1.0856	531	0.7425	531	0.955	531	0.8083
532	3.4097	532	1.5929	532	1.5353	532	0.7262	532	0.7106	532	0.7794	532	1.2549	532	0.8768	532	1.0098	532	0.8316	532	0.9815	532	0.8479
533	2.9506	533	1.485	533	1.3798	533	0.7253	533	0.716	533	0.7852	533	1.2953	533	0.9023	533	1.0531	533	0.731	533	0.8621	533	0.7659
534	2.6411	534	1.478	534	1.3313	534	0.7697	534	0.7235	534	0.7762	534	1.2968	534	0.9029	534	1.0618	534	0.7102	534	0.7949	534	0.7746
535	2.3801	535	1.5281	535	1.3253	535	0.7323	535	0.6872	535	0.7203	535	1.2013	535	0.8424	535	0.9795	535	0.7674	535	0.8287	535	0.8913
536	2.3326	536	1.5526	536	1.3564	536	0.663	536	0.6481	536	0.6793	536	1.1531	536	0.8212	536	0.9511	536	0.8461	536	0.8692	536	0.8862
537	2.3007	537	1.3647	537	1.209	537	0.7101	537	0.6818	537	0.7151	537	1.197	537	0.8807	537	1.0211	537	0.8736	537	0.782	537	0.789
538	2.0916	538	1.2927	538	1.1092	538	0.7665	538	0.7021	538	0.738	538	1.151	538	0.8816	538	1.0045	538	0.9862	538	0.825	538	0.7706
539	1.9678	539	1.4084	539	1.1916	539	0.7266	539	0.6726	539	0.7017	539	1.0692	539	0.8213	539	0.9264	539	1.3445	539	0.938	539	1.1945
540	2.0046	540	1.3538	540	1.1767	540	0.6501	540	0.6581	540	0.6898	540	1.038	540	0.8198	540	0.9323	540	1.4552	540	1.0234	540	0.9726
541	1.8704	541	1.1491	541	1.0089	541	0.6885	541	0.6731	541	0.7528	541	1.0505	541	0.8475	541	0.9633	541	1.1849	541	0.7822	541	0.8082
542	1.6913	542	1.2074	542	1.0221	542	0.7502	542	0.7215	542	0.8006	542	1.0111	542	0.8511	542	0.9445	542	1.0472	542	0.7865	542	0.7954
543	1.7353	543	1.3386	543	1.1269	543	0.7015	543	0.7098	543	0.7692	543	0.9546	543	0.8185	543	0.9085	543	1.0028	543	0.801	543	0.8048
544	1.7246	544	1.1848	544	1.0173	544	0.6497	544	0.6822	544	0.7611	544	0.9614	544	0.8374	544	0.9242	544	0.9976	544	0.8472	544	0.8128
545	1.491	545	1.0229	545	0.8807	545	0.7023	545	0.7233	545	0.8042	545	0.9541	545	0.8495	545	0.9253	545	1.0372	545	0.886	545	0.8514
546	1.4488	546	1.1541	546	0.9831	546	0.7206	546	0.7506	546	0.8139	546	0.9	546	0.8186	546	0.8949	546	0.9249	546	0.8222	546	0.7906
547	1.6188	547	1.2051	547	1.0257	547	0.6446	547	0.6816	547	0.7691	547	0.8306	547	0.8104	547	0.8721	547	0.8414	547	0.805	547	0.7419
548	1.5097	548	1.0172	548	0.8709	548	0.6569	548	0.6738	548	0.7862	548	0.8438	548	0.8537	548	0.8978	548	0.931	548	0.9083	548	0.8037
549	1.2785	549	0.9848	549	0.8482	549	0.7457	549	0.7359	549	0.842	549	0.8675	549	0.8867	549	0.9101	549	0.9548	549	0.9262	549	0.8058
550	1.4404	550	1.1438	550	0.9536	550	0.701	550	0.6815	550	0.8056	550	0.7928	550	0.8433	550	0.8758	550	0.8311	550	0.844	550	0.7305
551	1.5035	551	1.0555	551	0.9001	551	0.6861	551	0.6535	551	0.8055	551	0.7814	551	0.8665	551	0.8977	551	0.8333	551	0.8865	551	0.7309
552	1.2515	552	0.8674	552	0.7789	552	0.7464	552	0.6892	552	0.8325	552	0.7887	552	0.9127	552	0.9299	552	0.9498	552	1.0497	552	0.8151
553	1.2563	553	1.0042	553	0.8747	553	0.7669	553	0.6728	553	0.8198	553	0.7418	553	0.8884	553	0.8878	553	0.9651	553	1.0781	553	0.8477
554	1.5152	554	1.137	554	0.9946	554	0.7383	554	0.6283	554	0.824	554	0.6966	554	0.8894	554	0.8841	554	0.918	554	0.9826	554	0.824
555	1.3612	555	0.9515	555	0.8586	555	0.7984	555	0.6715	555	0.8859	555	0.7297	555	0.9716	555	0.9673	555	1.0267	555	1.0935	555	0.9156
556	1.2162	556	0.9295	556	0.8252	556	0.8724	556	0.7196	556	0.9011	556	0.755	556	1.011	556	0.9882	556	1.0294	556	1.0894	556	0.8598
557	1.4756	557	1.1084	557	0.9392	557	0.889	557	0.7161	557	0.9076	557	0.7636	557	1.0021	557	0.9611	557	1.2313	557	1.2465	557	0.963
558	1.5468	558	1.0258	558	0.8966	558	0.986	558	0.7957	558	1.0195	558	0.848	558	1.1161	558	1.0862	558	1.0728	558	1.0729	558	0.8312
559	1.3318	559	0.8922	559	0.8074	559	1.081	559	0.9017	559	1.1089	559	0.9229	559	1.2169	559	1.1968	559	1.0351	559	0.9875	559	0.8007
560	1.4416	560	1.0278	560	0.8928	560	0.9612	560	0.8132	560	1.0361	560	0.8764	560	1.138	560	1.1309	560	1.0028	560	0.9411	560	0.7754
561	1.6995	561	1.1138	561	0.947	561	0.9623	561	0.8378	561	1.0441	561	0.9478	561	1.1773	561	1.1724	561	1.0321	561	0.9442	561	0.799
562	1.6113	562	1.0121	562	0.8849	562	0.862	562	0.7652	562	0.9906	562	0.9028	562	1.1099	562	1.1279	562	0.9761	562	0.8928	562	0.763
563	1.5874	563	1.113	563	0.9815	563	0.78	563	0.7197	563	0.9336	563	0.8945	563	1.0414	563	1.093	563	0.8676	563	0.8072	563	0.7007
564	1.8677	564	1.333	564	1.1329	564	0.7388	564	0.7032	564	0.924	564	0.8994	564	1.0196	564	1.0745	564	0.8688	564	0.7822	564	0.6991
565	1.7783	565	1.3682	565	1.1247	565	0.7284	565	0.728	565	0.932	565	0.9674	565	1.0241	565	1.078	565	0.9015	565	0.7767	565	0.7088
566	1.9482	566	1.5373	566	1.2601	566	0.7536	566	0.7233	566	0.925	566	0.9146	566	0.9964	566	1.025	566	0.8263	566	0.7277	566	0.6644
567	1.7031	567	1.3724	567	1.154	567	0.674	567	0.6576	567	0.8448	567	0.8074	567	0.917	567	0.9463	567	0.7512	567	0.6615	567	0.619
568	1.4887	568	1.215	568	1.0544	568	0.6465	568	0.6923	568	0.8523	568	0.9149	568	0.9155	568	0.9667	568	0.8234	568	0.68	568	0.6518
569	1.2936	569	1.0433	569	0.9368	569	0.7325	569	0.7751	569	0.9174	569	1.0005	569	0.9931	569	1.0194	569	0.8537	569	0.6773	569	0.6626
570	1.3191	570	0.9685	570	0.9064	570	0.6896	570	0.7195	570	0.8539	570	0.8626	570	0.9208	570	0.9298	570	0.7354	570	0.6247	570	0.6174
571	1.2168	571	0.8915	571	0.8525	571	0.7	571	0.7539	571	0.8586	571	0.8837	571	0.9049	571	0.9278	571	0.6929	571	0.6078	571	0.6119
572	1.0757	572	0.7912	572	0.7554	572	0.835	572	0.9114	572	1.0281	572	0.9707	572	1.0312	572	1.0822	572	0.7056	572	0.6113	572	0.6344
573	1.1668	573	0.7637	573	0.7454	573	0.8972	573	0.9953	573	1.0484	573	1.0107	573	1.1184	573	1.4709	573	0.715	573	0.6584	573	0.6681
574	1.4084	574	0.8358	574	0.8383	574	1.3956	574	1.3443	574	1.353	574	1.2033	574	1.4057	574	1.6825	574	0.6888	574	0.6224	574	0.644
575	1.3918	575	0.7611	575	0.7802	575	1.7553	575	1.8615	575	1.8238	575	1.6074	575	1.7426	575	3.4057	575	0.6573	575	0.5901	575	0.6106
576	1.4283	576	0.781	576	0.7843	576	1.3388	576	1.4175	576	1.2338	576	1.6125	576	1.45	576	1.5996	576	0.6537	576	0.6107	576	0.6304
577	1.6785	577	0.91	577	0.9233	577	1.0739	577	1.0773	577	0.9767	577	1.4365	577	1.2426	577	1.3345	577	0.6599	577	0.638	577	0.653
578	2.0395	578	1.0545	578	1.0533	578	0.9621	578	0.9843	578	0.935	578	1.3657	578	1.1512	578	1.2615	578	0.6225	578	0.6115	578	0.604
579	2.3022	579	1.2202	579	1.2231	579	0.9427	579	0.9581	579	0.9563	579	1.3527	579	1.146	579	1.2517	579	0.6184	579	0.628	579	0.6252
580	2.691	580	1.6819	580	1.7096	580	0.9395	580	0.9223	580	0.9468	580	1.3013	580	1.1707	580	1.2305	580	0.6754	580	0.6968	580	0.7153
						581	0.9437	581	0.908	581	0.9725	581	1.3263	581	1.1756	581	1.2494	581	0.6605	581	0.7228	581	0.672
						582	0.8099	582	0.8243	582	0.9146	582	1.2528	582	1.0773	582	1.1705	582	0.6272	582	0.7259	582	0.658
						583	0.7445	583	0.7803	583	0.8805	583	1.1437	583	1.0318	583	1.1037	583	0.6632	583	0.8	583	0.7195
						584	0.8195	584	0.8184	584	0.9149	584	1.16	584	1.0819	584	1.144	584	0.6844	584	0.8344	584	0.7274
						585	0.8397	585	0.8361	585	0.9152	585	1.1867	585	1.0886	585	1.144	585	0.6734	585	0.8167	585	0.6997
						586	0.774	586	0.789	586	0.8511	586	1.1038	586	0.9999	586	1.0571	586	0.7261	586	0.9232	586	0.7668
						587	0.7778	587	0.7823	587	0.8601	587	1.0523	587	1.0038	587	1.0551	587	0.7699	587	0.9813	587	0.8568
						588	0.9184	588	0.953	588	0.9876	588	1.1502	588	1.1376	588	1.142	588	0.8074	588	1.0316	588	0.8592
						589	0.9773	589	1.0786	589	1.0155	589	1.194	589	1.2041	589	1.1752	589	0.9029	589	1.0602	589	0.9178
						590	0.902	590	0.9343	590	0.943	590	1.0807	590	1.2115	590	1.1651	590	0.975	590	1.5356	590	0.9982
						591	0.988	591	0.9675	591	1.0319	591	1.119	591	1.2618	591	1.2183	591	0.8552	591	1.155	591	0.8899
						592	0.9854	592	0.9628	592	1.0402	592	1.1019	592	1.2573	592	1.2425	592	0.8662	592	1.0042	592	0.8891
						593	1.1293	593	1.0817	593	1.1739	593	1.1734	593	1.372	593	1.4204	593	0.8129	593	0.8698	593	0.7709
						594	0.909	594	0.8447	594	1.0074	594	1.0206	594	1.1671	594	1.1931	594	0.7145	594	0.7891	594	0.6898
						595	0.8268	595	0.8033	595	0.9793	595	1.0483	595	1.1466	595	1.1991	595	0.6973	595	0.7858	595	0.6576
						596	0.7756	596	0.7804	596	0.9582	596	1.0583	596	1.122	596	1.1946	596	0.7194	596	0.8056	596	0.6566
						597	0.8012	597	0.8165	597	0.9775	597	1.1639	597	1.168	597	1.2633	597	0.7385	597	0.8435	597	0.6685
						598	0.7723	598	0.7966	598	0.9422	598	1.1144	598	1.1279	598	1.2033	598	0.6708	598	0.7493	598	0.6248
						599	0.6897	599	0.7214	599	0.8673	599	1.0125	599	1.026	599	1.099	599	0.6713	599	0.7266	599	0.6208
						600	0.6989	600	0.7331	600	0.8518	600	1.0934	600	1.0379	600	1.1153	600	0.7756	600	0.7957	600	0.6608
						601	0.7398	601	0.7831	601	0.8547	601	1.1571	601	1.0706	601	1.1501	601	0.7176	601	0.7478	601	0.6194
						602	0.6977	602	0.7321	602	0.822	602	1.0637	602	0.9944	602	1.0905	602	0.7143	602	0.7882	602	0.6344
						603	0.6495	603	0.683	603	0.7798	603	1.0211	603	0.9274	603	1.0244	603	0.8131	603	0.8548	603	0.6579
						604	0.7115	604	0.7402	604	0.8122	604	1.1238	604	0.999	604	1.0819	604	0.9771	604	1.1455	604	0.7307
						605	0.7509	605	0.7745	605	0.8692	605	1.1294	605	1.0007	605	1.1128	605	1.0668	605	1.2815	605	0.7406
						606	0.6909	606	0.7248	606	0.7444	606	1.0289	606	0.9035	606	1.0157	606	1.2203	606	1.633	606	0.8433
						607	0.6361	607	0.6881	607	0.7039	607	1.0483	607	0.8663	607	0.9755	607	2.0528	607	3.2044	607	1.3334
						608	0.646	608	0.7238	608	0.6974	608	1.1439	608	0.9386	608	1.0386	608	1.2749	608	1.2245	608	1.1666
						609	0.7008	609	0.761	609	0.6904	609	1.1368	609	0.9559	609	1.0349	609	1.0021	609	0.9016	609	0.8805
						610	0.6784	610	0.739	610	0.6693	610	1.0582	610	0.8616	610	0.9635	610	0.9134	610	0.8301	610	0.7887
						611	0.6445	611	0.7045	611	0.6594	611	1.1173	611	0.8711	611	0.978	611	0.8954	611	0.7905	611	0.7505
						612	0.6855	612	0.753	612	0.7126	612	1.1693	612	0.9336	612	1.0118	612	0.8463	612	0.7471	612	0.715
						613	0.7144	613	0.7689	613	0.7284	613	1.1012	613	0.8917	613	0.9558	613	0.8747	613	0.7333	613	0.7315
						614	0.6818	614	0.7167	614	0.6813	614	1.0936	614	0.8283	614	0.8939	614	0.7987	614	0.667	614	0.685
						615	0.6962	615	0.7248	615	0.7345	615	1.1769	615	0.8882	615	0.9478	615	0.7325	615	0.6351	615	0.65
						616	0.8066	616	0.8179	616	0.8252	616	1.176	616	0.9474	616	0.9919	616	0.7798	616	0.6661	616	0.6842
						617	0.7557	617	0.7854	617	0.7764	617	1.1209	617	0.87	617	0.9176	617	0.7746	617	0.6532	617	0.7019
						618	0.7183	618	0.7346	618	0.7651	618	1.1653	618	0.8513	618	0.9056	618	0.6965	618	0.6378	618	0.6854
						619	0.794	619	0.7953	619	0.8495	619	1.2214	619	0.9226	619	0.9694	619	0.6732	619	0.649	619	0.6777
						620	0.7882	620	0.7986	620	0.8481	620	1.1739	620	0.9145	620	0.9371	620	0.7309	620	0.6722	620	0.7342
						621	0.7308	621	0.7461	621	0.8126	621	1.1748	621	0.8754	621	0.8923	621	0.7512	621	0.6977	621	0.8016
						622	0.7872	622	0.7847	622	0.8741	622	1.2751	622	0.9344	622	0.9738	622	0.7248	622	0.826	622	0.9005
						623	0.8662	623	0.8653	623	0.9639	623	1.3045	623	0.9941	623	1.0378	623	0.7235	623	0.8845	623	0.8941
						624	0.8527	624	0.8619	624	0.9703	624	1.2707	624	0.9786	624	0.9992	624	0.8095	624	0.8802	624	0.9042
						625	0.933	625	0.9364	625	1.0562	625	1.3753	625	1.0583	625	1.0797	625	1.106	625	1.212	625	1.144
						626	1.0419	626	1.0549	626	1.1819	626	1.4874	626	1.1658	626	1.2206	626	0.8118	626	0.8851	626	0.8144
						627	0.9622	627	0.9634	627	1.0883	627	1.416	627	1.0875	627	1.1522	627	0.7356	627	0.7833	627	0.7153
						628	0.9776	628	0.9893	628	1.1139	628	1.4411	628	1.1433	628	1.1938	628	0.7307	628	0.7598	628	0.679
						629	0.8581	629	0.8705	629	1.0031	629	1.3661	629	1.0266	629	1.0921	629	0.7742	629	0.7898	629	0.6961
						630	0.7938	630	0.7894	630	0.9064	630	1.3035	630	0.9446	630	1.035	630	0.7566	630	0.7995	630	0.683
						631	0.7688	631	0.7462	631	0.8379	631	1.2624	631	0.8908	631	0.983	631	0.6894	631	0.7116	631	0.6325
						632	0.7808	632	0.7408	632	0.81	632	1.2398	632	0.8705	632	0.9678	632	0.71	632	0.6966	632	0.6342
						633	0.7889	633	0.7473	633	0.8367	633	1.1993	633	0.8578	633	0.9287	633	0.737	633	0.7367	633	0.6465
						634	0.7243	634	0.6947	634	0.7584	634	1.131	634	0.8155	634	0.8783	634	0.702	634	0.7168	634	0.626
						635	0.7532	635	0.7096	635	0.7365	635	1.0944	635	0.8209	635	0.8922	635	0.6591	635	0.6493	635	0.5918
						636	0.8753	636	0.8084	636	0.8277	636	1.1266	636	0.8905	636	0.9385	636	0.7167	636	0.6932	636	0.6295
						637	0.8242	637	0.7767	637	0.7819	637	1.0844	637	0.8464	637	0.8767	637	0.7613	637	0.75	637	0.6574
						638	0.809	638	0.7855	638	0.769	638	1.0779	638	0.8518	638	0.8691	638	0.7096	638	0.6893	638	0.6198
						639	0.928	639	0.8631	639	0.9091	639	1.1318	639	0.9872	639	1.0562	639	0.6832	639	0.639	639	0.6016
						640	1.0431	640	1.1683	640	1.067	640	1.2164	640	1.1095	640	1.4513	640	0.7313	640	0.6987	640	0.631
						641	1.1493	641	1.3963	641	1.1223	641	1.3332	641	1.2858	641	1.9381	641	0.7623	641	0.738	641	0.6598
						642	1.4683	642	1.8947	642	1.5455	642	1.7377	642	1.6509	642	3.159	642	0.7203	642	0.6843	642	0.6521
						643	1.4617	643	1.2566	643	1.5364	643	1.3111	643	1.6503	643	1.3814	643	0.7117	643	0.6772	643	0.6443
						644	1.0631	644	1.0356	644	1.3135	644	1.0642	644	1.4148	644	1.1213	644	0.7382	644	0.7322	644	0.6608
						645	0.9409	645	0.9511	645	1.2463	645	0.9412	645	1.2009	645	1.0017	645	0.7495	645	0.7499	645	0.6975
						646	0.9352	646	0.9619	646	1.33	646	0.8962	646	1.1436	646	0.9592	646	0.6958	646	0.7125	646	0.6543
						647	0.8962	647	0.9352	647	1.2984	647	0.8083	647	1.0834	647	0.904	647	0.7227	647	0.7555	647	0.6681
						648	0.9521	648	1.0156	648	1.4332	648	0.8256	648	1.1303	648	0.9179	648	0.8063	648	0.8542	648	0.7441
						649	0.8631	649	0.9632	649	1.3529	649	0.786	649	1.0703	649	0.8542	649	0.7799	649	0.8278	649	0.7283
						650	0.7646	650	0.8391	650	1.1723	650	0.6948	650	0.9581	650	0.7695	650	0.7683	650	0.814	650	0.6978
						651	0.8208	651	0.9052	651	1.2708	651	0.6967	651	1.0039	651	0.8106	651	0.8082	651	0.8739	651	0.7446
						652	0.8355	652	0.9742	652	1.3871	652	0.7372	652	1.079	652	0.8509	652	0.8054	652	0.8829	652	0.7573
						653	0.7496	653	0.8739	653	1.2356	653	0.7042	653	1.0016	653	0.8114	653	0.802	653	0.875	653	0.73
						654	0.7314	654	0.8376	654	1.1832	654	0.6655	654	0.9669	654	0.811	654	0.8641	654	0.9427	654	0.7728
						655	0.9007	655	0.9753	655	1.4286	655	0.6708	655	1.1164	655	0.9211	655	0.9153	655	1.0096	655	0.8328
						656	1.0031	656	1.031	656	1.4905	656	0.7016	656	1.2128	656	0.9943	656	0.9247	656	1.0238	656	0.8172
						657	0.9185	657	0.9625	657	1.4244	657	0.7291	657	1.1571	657	1.006	657	1.0206	657	1.1118	657	0.9194
						658	0.9611	658	0.9968	658	1.533	658	0.7141	658	1.1931	658	1.0308	658	1.1093	658	1.2166	658	1.0109
						659	0.9653	659	0.9382	659	1.3547	659	0.6484	659	1.1342	659	1.0281	659	1.0234	659	1.1387	659	0.9015
						660	1.1852	660	1.0041	660	1.293	660	0.7157	660	1.2733	660	1.1571	660	1.0346	660	1.1475	660	0.8882
						661	0.8984	661	0.8544	661	1.1739	661	0.6538	661	1.0344	661	0.9123	661	0.9688	661	1.0612	661	0.8009
						662	0.8176	662	0.8187	662	1.1049	662	0.6576	662	0.9768	662	0.8444	662	0.9094	662	0.9516	662	0.7349
						663	0.7811	663	0.7798	663	0.9981	663	0.6711	663	0.9472	663	0.8061	663	0.8954	663	0.9137	663	0.7317
						664	0.8152	664	0.818	664	1.0233	664	0.7166	664	1.0058	664	0.8459	664	0.909	664	0.8934	664	0.7506
						665	0.7845	665	0.7602	665	0.8943	665	0.7142	665	0.9679	665	0.8292	665	0.9031	665	0.9071	665	0.7703
						666	0.6932	666	0.6914	666	0.8486	666	0.6522	666	0.8586	666	0.7343	666	0.8062	666	0.8318	666	0.7093
						667	0.7048	667	0.7347	667	0.9467	667	0.6694	667	0.894	667	0.7444	667	0.8088	667	0.8006	667	0.7099
						668	0.7393	668	0.7385	668	0.9075	668	0.7212	668	0.9609	668	0.7974	668	0.912	668	0.919	668	0.8227
						669	0.6947	669	0.6785	669	0.7726	669	0.7088	669	0.8998	669	0.7637	669	0.8532	669	0.8781	669	0.781
						670	0.6376	670	0.6609	670	0.7872	670	0.6805	670	0.8602	670	0.7067	670	0.7948	670	0.784	670	0.7536
						671	0.6957	671	0.7237	671	0.8783	671	0.7479	671	0.9731	671	0.7948	671	0.9022	671	0.8345	671	0.824
						672	0.7665	672	0.7555	672	0.8318	672	0.8098	672	1.017	672	0.8547	672	1.0281	672	0.9489	672	0.9811
						673	0.7202	673	0.7296	673	0.7611	673	0.8045	673	0.9813	673	0.8067	673	1.0694	673	1.0414	673	1.0993
						674	0.7035	674	0.7552	674	0.8108	674	0.8186	674	1.0062	674	0.8054	674	1.4389	674	1.5022	674	1.9033
						675	0.8134	675	0.8071	675	0.8673	675	0.9459	675	1.1373	675	0.9177	675	1.7017	675	1.3533	675	1.3277
						676	0.8742	676	0.8745	676	0.8718	676	1.0104	676	1.2349	676	0.9876	676	1.4979	676	1.1057	676	1.0918
						677	0.8658	677	0.8927	677	0.8745	677	0.9861	677	1.2297	677	0.9449	677	1.4991	677	1.0012	677	1.0282
						678	0.8481	678	0.9315	678	0.9086	678	1.0393	678	1.2824	678	0.9872	678	1.5675	678	0.9695	678	1.0059
						679	0.9252	679	1.031	679	0.9671	679	1.1891	679	1.4181	679	1.0899	679	1.5166	679	0.933	679	0.9675
						680	0.9957	680	1.0937	680	1.0246	680	1.2047	680	1.4909	680	1.111	680	1.637	680	0.9649	680	0.9928
						681	0.9689	681	1.0875	681	1.0214	681	1.1549	681	1.5158	681	1.0973	681	1.5171	681	0.8756	681	0.9092
						682	0.991	682	1.1539	682	1.0498	682	1.2783	682	1.6171	682	1.1999	682	1.2774	682	0.792	682	0.8299
						683	1.1283	683	1.2788	683	1.1844	683	1.444	683	1.7828	683	1.3334	683	1.3875	683	0.8297	683	0.8728
						684	1.1731	684	1.3	684	1.2529	684	1.4389	684	1.8403	684	1.3335	684	1.4947	684	0.8555	684	0.8936
						685	1.1378	685	1.3102	685	1.229	685	1.4316	685	1.8504	685	1.3637	685	1.2914	685	0.76	685	0.7837
						686	1.2401	686	1.4323	686	1.313	686	1.5975	686	2.0133	686	1.5174	686	1.17	686	0.7547	686	0.7804
						687	1.3776	687	1.5472	687	1.4672	687	1.6838	687	2.1791	687	1.6052	687	1.3225	687	0.8541	687	0.8998
						688	1.3855	688	1.5543	688	1.4908	688	1.5975	688	2.1749	688	1.5986	688	1.4483	688	0.8411	688	0.8667
						689	1.4095	689	1.6144	689	1.5264	689	1.6747	689	2.231	689	1.718	689	1.3438	689	0.8155	689	0.8152
						690	1.5921	690	1.795	690	1.7028	690	1.8886	690	2.441	690	1.8757	690	1.4191	690	0.9313	690	0.9362
						691	1.7301	691	1.8984	691	1.8255	691	1.9114	691	2.5542	691	1.9151	691	1.2701	691	0.8996	691	0.9403
						692	1.7557	692	1.9283	692	1.8358	692	1.8772	692	2.547	692	1.9861	692	1.2936	692	0.9999	692	1.0896
						693	1.822	693	2.0124	693	1.8828	693	2.0178	693	2.6193	693	2.1016	693	1.1728	693	0.9081	693	0.9605
						694	1.5904	694	1.8058	694	1.6539	694	1.8654	694	2.3804	694	1.9107	694	1.171	694	0.8647	694	0.9159
						695	1.4754	695	1.7292	695	1.5463	695	1.8046	695	2.2185	695	1.8492	695	1.1326	695	0.8334	695	0.8984
						696	1.3463	696	1.6108	696	1.4327	696	1.558	696	2.0846	696	1.7213	696	1.2325	696	0.8841	696	0.9477
						697	1.1939	697	1.4629	697	1.3114	697	1.361	697	1.8916	697	1.5456	697	1.1077	697	0.8518	697	0.9027
						698	1.1833	698	1.4122	698	1.282	698	1.1971	698	1.8569	698	1.4675	698	0.9857	698	0.7684	698	0.805
						699	1.1913	699	1.3731	699	1.2813	699	1.0995	699	1.8119	699	1.4019	699	1.0908	699	0.8013	699	0.8322
						700	1.3191	700	1.4627	700	1.3456	700	1.1747	700	1.9528	700	1.4942	700	1.1137	700	0.8397	700	0.8691
						701	1.1803	701	1.3353	701	1.2584	701	1.1814	701	1.8347	701	1.3522	701	0.9779	701	0.7844	701	0.8012
						702	1.078	702	1.2381	702	1.184	702	1.0763	702	1.6788	702	1.229	702	0.9345	702	0.723	702	0.7408
						703	1.2505	703	1.3591	703	1.3447	703	1.0715	703	1.8157	703	1.3394	703	1.0545	703	0.792	703	0.8197
						704	1.4425	704	1.3854	704	1.3943	704	1.2021	704	1.8687	704	1.3222	704	1.117	704	0.8767	704	0.8656
						705	1.3451	705	1.2857	705	1.2861	705	1.317	705	1.7244	705	1.2149	705	0.9475	705	0.8328	705	0.801
						706	1.5909	706	1.2955	706	1.3623	706	1.2632	706	1.6888	706	1.2305	706	0.9683	706	0.8233	706	0.7908
						707	2.1867	707	1.5931	707	1.7216	707	1.5341	707	1.8823	707	1.4878	707	1.0461	707	0.9348	707	0.8841
						708	2.5421	708	1.6531	708	1.7616	708	1.7472	708	1.9265	708	1.9656	708	1.0351	708	1.0153	708	0.9533
						709	2.9718	709	1.7312	709	1.9116	709	1.8438	709	2.1402	709	2.6368	709	1.0109	709	0.9801	709	0.9061
						710	3.9571	710	2.1462	710	2.4279	710	2.2703	710	2.6418	710	3.1051	710	1.0536	710	1.0122	710	0.9265
						711	1.2446	711	1.3277	711	1.6249	711	1.182	711	1.5588	711	1.3134	711	1.1322	711	1.1252	711	1.0307
						712	1.0399	712	1.0907	712	1.4334	712	1.0081	712	1.3012	712	1.0693	712	1.1988	712	1.181	712	1.0812
						713	0.9776	713	1.0978	713	1.3712	713	1.0225	713	1.2776	713	1.0531	713	1.2221	713	1.1746	713	1.0594
						714	0.9834	714	1.1213	714	1.3993	714	1.0961	714	1.3131	714	1.0908	714	1.2817	714	1.2452	714	1.1348
						715	1.0117	715	1.1317	715	1.4143	715	1.1592	715	1.4097	715	1.1625	715	1.4706	715	1.4184	715	1.2838
						716	1.0696	716	1.1513	716	1.4285	716	1.2724	716	1.4601	716	1.2132	716	1.5212	716	1.489	716	1.3041
						717	0.9694	717	1.0512	717	1.2533	717	1.1962	717	1.3293	717	1.1079	717	1.4855	717	1.4506	717	1.2842
						718	0.9138	718	1.0263	718	1.1661	718	1.1343	718	1.3202	718	1.0881	718	1.5744	718	1.5821	718	1.4205
						719	1.0325	719	1.1332	719	1.2511	719	1.3058	719	1.4899	719	1.2231	719	1.7334	719	1.7418	719	1.5196
						720	1.0551	720	1.1282	720	1.2169	720	1.372	720	1.4943	720	1.2354	720	1.7521	720	1.7526	720	1.4977
						721	0.9615	721	1.0574	721	1.066	721	1.2594	721	1.4101	721	1.1508	721	1.7589	721	1.7775	721	1.5674
						722	1.0185	722	1.1648	722	1.0982	722	1.3287	722	1.5535	722	1.2409	722	1.9366	722	1.9719	722	1.7626
						723	1.1688	723	1.2896	723	1.2353	723	1.5391	723	1.7008	723	1.376	723	2.0863	723	2.1066	723	1.8372
						724	1.1834	724	1.2718	724	1.2532	724	1.6211	724	1.7024	724	1.3801	724	2.0805	724	2.1024	724	1.8529
						725	1.1519	725	1.3073	725	1.2156	725	1.6674	725	1.818	725	1.4224	725	2.1037	725	2.13	725	1.9563
						726	1.2857	726	1.4762	726	1.3585	726	1.8191	726	2.0318	726	1.6079	726	1.8777	726	1.8723	726	1.7185
						727	1.2656	727	1.4766	727	1.3962	727	1.7758	727	2.0107	727	1.6177	727	1.7356	727	1.7317	727	1.6357
						728	1.3833	728	1.6902	728	1.6762	728	1.9834	728	2.1635	728	1.8515	728	1.6594	728	1.5883	728	1.5078
						729	1.2619	729	1.5349	729	1.451	729	1.6449	729	1.9679	729	1.6406	729	1.5556	729	1.4179	729	1.3385
						730	1.2042	730	1.4784	730	1.3707	730	1.4601	730	1.816	730	1.529	730	1.5721	730	1.379	730	1.29
						731	1.1411	731	1.4126	731	1.3511	731	1.3535	731	1.7597	731	1.4583	731	1.6257	731	1.3503	731	1.2427
						732	1.1706	732	1.3975	732	1.383	732	1.2855	732	1.7077	732	1.4127	732	1.751	732	1.4815	732	1.3312
						733	1.1433	733	1.3583	733	1.3213	733	1.1812	733	1.7032	733	1.3604	733	1.5645	733	1.4122	733	1.2323
						734	1.0128	734	1.229	734	1.1701	734	1.0992	734	1.5721	734	1.243	734	1.4633	734	1.2624	734	1.1203
						735	0.9481	735	1.1616	735	1.1967	735	1.0347	735	1.4513	735	1.1654	735	1.681	735	1.4021	735	1.23
						736	0.9767	736	1.1677	736	1.2846	736	0.9843	736	1.4663	736	1.1623	736	1.6798	736	1.48	736	1.282
						737	0.9597	737	1.1147	737	1.1882	737	0.9148	737	1.4352	737	1.102	737	1.4769	737	1.377	737	1.1894
						738	0.8506	738	0.99	738	1.0759	738	0.8814	738	1.285	738	0.9829	738	1.493	738	1.3672	738	1.2196
						739	0.8488	739	0.978	739	1.1722	739	0.8869	739	1.2401	739	0.9637	739	1.7722	739	1.7083	739	1.4896
						740	0.9416	740	1.0191	740	1.2592	740	0.9187	740	1.2926	740	0.9927	740	1.8168	740	1.773	740	1.5672
						741	0.9164	741	0.9591	741	1.1486	741	0.8649	741	1.2053	741	0.9137	741	2.2347	741	2.1443	741	2.0568
						742	0.8045	742	0.864	742	1.0193	742	0.7641	742	1.0657	742	0.8193	742	1.9352	742	1.3312	742	1.3452
						743	0.7761	743	0.8958	743	1.0474	743	0.7069	743	1.0617	743	0.8194	743	1.7284	743	1.0699	743	1.0963
						744	0.8283	744	0.937	744	1.0804	744	0.7263	744	1.0956	744	0.8616	744	1.611	744	1.0272	744	1.0574
						745	0.7602	745	0.8438	745	0.9488	745	0.7184	745	0.992	745	0.7687	745	1.6413	745	1.0455	745	1.0931
						746	0.6966	746	0.7943	746	0.9116	746	0.6428	746	0.9027	746	0.7088	746	1.6312	746	1.0872	746	1.1192
						747	0.7463	747	0.8505	747	1.0081	747	0.631	747	0.939	747	0.7588	747	1.6474	747	1.135	747	1.1731
						748	0.7454	748	0.8368	748	0.9723	748	0.6612	748	0.9291	748	0.7614	748	1.4833	748	1.0567	748	1.0927
						749	0.6665	749	0.7229	749	0.8515	749	0.6239	749	0.818	749	0.6826	749	1.3661	749	1.0259	749	1.0507
						750	0.6693	750	0.7271	750	0.92	750	0.5957	750	0.8215	750	0.7109	750	1.4365	750	1.1414	750	1.1657
						751	0.755	751	0.8159	751	1.044	751	0.6494	751	0.9108	751	0.8154	751	1.4498	751	1.186	751	1.2102
						752	0.7058	752	0.7092	752	0.8936	752	0.6458	752	0.8447	752	0.7599	752	1.2866	752	1.1293	752	1.1297
						753	0.6707	753	0.6269	753	0.8423	753	0.6129	753	0.8064	753	0.725	753	1.2996	753	1.2072	753	1.1969
						754	0.7509	754	0.6798	754	0.9828	754	0.6027	754	0.8771	754	0.7884	754	1.4394	754	1.3558	754	1.3745
						755	0.7899	755	0.6652	755	0.9621	755	0.6377	755	0.8905	755	0.8302	755	1.4712	755	1.3774	755	1.3851
						756	0.7695	756	0.6101	756	0.8591	756	0.6399	756	0.8641	756	0.8034	756	1.424	756	1.4076	756	1.3579
						757	0.8359	757	0.6429	757	0.9115	757	0.6318	757	0.9218	757	0.8296	757	1.6029	757	1.589	757	1.5179
						758	0.9098	758	0.7043	758	1.008	758	0.6743	758	1.0029	758	0.9256	758	1.5863	758	1.5637	758	1.5157
						759	0.9237	759	0.6829	759	0.9798	759	0.7042	759	1.0046	759	0.9571	759	1.7746	759	1.6854	759	1.6248
						760	1.0043	760	0.7789	760	1.0277	760	0.7698	760	1.0983	760	1.0151	760	1.6119	760	1.5041	760	1.4331
						761	1.05	761	0.8967	761	1.1612	761	0.8428	761	1.1944	761	1.1084	761	1.5558	761	1.3677	761	1.3491
						762	0.9331	762	0.7947	762	1.0938	762	0.7607	762	1.0885	762	0.995	762	1.5762	762	1.3101	762	1.2926
						763	0.9655	763	0.8381	763	1.1894	763	0.7421	763	1.0896	763	0.9905	763	1.6356	763	1.2741	763	1.2699
						764	0.8597	764	0.7855	764	1.0548	764	0.6795	764	0.9822	764	0.8769	764	1.614	764	1.2709	764	1.2128
						765	0.7482	765	0.7041	765	0.9362	765	0.6291	765	0.8905	765	0.7737	765	1.4526	765	1.1727	765	1.1169
						766	0.7323	766	0.6596	766	0.8069	766	0.6606	766	0.862	766	0.7487	766	1.4215	766	1.0817	766	1.0804
						767	0.756	767	0.6586	767	0.744	767	0.7038	767	0.8854	767	0.7593	767	1.5397	767	1.098	767	1.0675
						768	0.7802	768	0.6454	768	0.7262	768	0.7192	768	0.8928	768	0.7805	768	1.4703	768	1.0822	768	0.9976
						769	0.7035	769	0.6004	769	0.7378	769	0.6587	769	0.7934	769	0.7068	769	1.2937	769	0.9628	769	0.9079
						770	0.703	770	0.6104	770	0.7193	770	0.6977	770	0.8025	770	0.7007	770	1.383	770	0.9448	770	0.9346
						771	0.8014	771	0.6678	771	0.7246	771	0.8107	771	0.9089	771	0.8117	771	1.4476	771	0.9953	771	0.9346
						772	0.7376	772	0.632	772	0.7149	772	0.7603	772	0.8446	772	0.7628	772	1.2796	772	0.9284	772	0.8342
						773	0.7005	773	0.649	773	0.7412	773	0.7316	773	0.8148	773	0.7166	773	1.1483	773	0.821	773	0.7685
						774	0.7952	774	0.7492	774	0.7706	774	0.8833	774	0.9042	774	0.7783	774	1.2671	774	0.8113	774	0.789
						775	0.9341	775	0.9073	775	0.879	775	1.1507	775	1.0831	775	0.9857	775	1.2775	775	0.8391	775	0.7645
						776	0.9592	776	0.982	776	0.9663	776	1.1971	776	1.076	776	1.0327	776	1.0823	776	0.7814	776	0.7209
						777	1.1082	777	1.5111	777	1.1845	777	1.8311	777	1.4942	777	1.4914	777	1.0437	777	0.733	777	0.6998
																		778	1.1246	778	0.7538	778	0.7182
																		779	1.0392	779	0.7336	779	0.7076
																		780	0.9016	780	0.6665	780	0.6711
																		781	0.9609	781	0.6769	781	0.6869
																		782	1.0274	782	0.7323	782	0.7421
																		783	0.9311	783	0.7003	783	0.722
																		784	0.8693	784	0.7163	784	0.7131
																		785	0.9587	785	0.7963	785	0.7937
																		786	0.9663	786	0.828	786	0.8237
																		787	0.8617	787	0.8361	787	0.8057
																		788	0.8987	788	0.9187	788	0.858
																		789	0.9717	789	0.9944	789	0.8898
																		790	0.9588	790	1.0313	790	0.8888
																		791	1.0035	791	1.1331	791	0.9919
																		792	1.1008	792	1.1602	792	1.0908
																		793	1.0518	793	1.0304	793	0.995
																		794	1.1343	794	1.0386	794	0.9885
																		795	1.025	795	0.9361	795	0.8905
																		796	0.95	796	0.8203	796	0.8246
																		797	0.8845	797	0.8017	797	0.8047
																		798	0.8822	798	0.8131	798	0.816
																		799	0.8405	799	0.8195	799	0.8099
																		800	0.7852	800	0.7459	800	0.7303
																		801	0.8072	801	0.7445	801	0.7256
																		802	0.8662	802	0.8201	802	0.8106
																		803	0.8222	803	0.7453	803	0.7515
																		804	0.8574	804	0.7433	804	0.7369
																		805	0.9893	805	0.8782	805	0.8262
																		806	1.1043	806	0.9556	806	0.9218
																		807	1.4882	807	1.0738	807	0.9783
																		808	2.4041	808	1.5304	808	1.4146
																		809	4.3075	809	4.9194	809	4.7094
																		810	3.943	810	4.5679	810	4.639
																		811	3.6742	811	4.0406	811	4.5616
																		812	3.5301	812	3.5539	812	4.5148
																		813	3.2265	813	3.1787	813	3.8994
																		814	2.7482	814	2.5896	814	3.1549
																		815	2.1801	815	1.957	815	2.4067
																		816	1.8063	816	1.5869	816	1.6721
																		817	1.8602	817	1.7156	817	1.7607
																		818	2.3591	818	2.1887	818	2.4103
																		819	2.8484	819	2.4803	819	2.849
																		820	3.2378	820	2.5502	820	3.0177
																		821	3.7405	821	2.5195	821	2.9573
																		822	3.4908	822	2.3155	822	2.7069
																		823	3.2867	823	2.1172	823	2.354
																		824	2.8043	824	1.7658	824	2.0018
																		825	2.3403	825	1.3662	825	1.4759
																		826	2.0179	826	1.17	826	1.2324
																		827	2.0808	827	1.3349	827	1.386
																		828	2.5231	828	1.7856	828	1.8945
																		829	2.9252	829	2.1913	829	2.2724
																		830	3.0477	830	2.3576	830	2.4238
																		831	3.0149	831	2.4118	831	2.4659
																		832	2.7121	832	2.3012	832	2.2847
																		833	2.3292	833	1.9996	833	1.9922
																		834	1.8562	834	1.6908	834	1.5756
																		835	1.4401	835	1.4017	835	1.2603
																		836	1.2557	836	1.3256	836	1.2006
																		837	1.5029	837	1.6248	837	1.4684
																		838	1.8019	838	1.9541	838	1.7697
																		839	2.1262	839	2.2741	839	2.1447
																		840	2.3739	840	2.4996	840	2.3804
																		841	2.5139	841	2.5079	841	2.3507
																		842	2.4454	842	2.4931	842	2.235
																		843	2.3911	843	2.3027	843	2.0518
																		844	2.0316	844	2.0271	844	1.7095
																		845	1.6392	845	1.719	845	1.417
																		846	1.2745	846	1.3441	846	0.948
																		847	1.3281	847	1.3351	847	1.0491
																		848	1.7945	848	1.8575	848	1.5055
																		849	2.1203	849	2.2149	849	1.8438
																		850	2.3225	850	2.3267	850	2.0115
																		851	2.3432	851	2.2933	851	2.0999
																		852	2.28	852	2.102	852	2.0593
																		853	2.0383	853	1.8583	853	1.8457
																		854	1.6576	854	1.4945	854	1.5869
																		855	1.2322	855	1.0579	855	1.1625
																		856	1.038	856	0.8818	856	0.8776
																		857	1.1312	857	1.1085	857	1.0291
																		858	1.5783	858	1.5694	858	1.4626
																		859	1.89	859	1.9429	859	1.9011
																		860	1.8945	860	2.0233	860	2.0057
																		861	1.9043	861	2.0168	861	1.9779
																		862	1.8222	862	1.9685	862	1.9916
																		863	1.7246	863	1.9569	863	1.9082
																		864	1.4759	864	1.8907	864	1.5458
																		865	1.1582	865	1.4631	865	1.2579
																		866	1.0024	866	1.2046	866	0.9649
																		867	1.3538	867	1.4873	867	1.1412
																		868	1.7399	868	1.9179	868	1.4906
																		869	1.8878	869	2.2706	869	1.6745
																		870	1.9807	870	2.544	870	1.8302
																		871	2.063	871	2.6705	871	1.922
																		872	2.0327	872	2.6537	872	1.9178
																		873	1.8525	873	2.5345	873	1.821
																		874	1.6152	874	2.2339	874	1.6052
																		875	1.2229	875	1.806	875	1.2761
																		876	0.9993	876	1.5535	876	1.0952
																		877	1.1425	877	1.6178	877	1.2194
																		878	1.5734	878	1.965	878	1.614
																		879	1.8678	879	2.2598	879	1.9047
																		880	2.0645	880	2.4433	880	2.108
																		881	2.1916	881	2.5136	881	2.1345
																		882	2.0971	882	2.5053	882	2.0154
																		883	1.9747	883	2.3154	883	1.9357
																		884	1.8205	884	2.1215	884	1.8608
																		885	1.4644	885	1.7501	885	1.6013
																		886	1.0956	886	1.208	886	1.4417
																		887	1.3889	887	1.1651	887	1.829
																		888	1.8425	888	1.6343	888	2.2199
																		889	1.9185	889	1.9156	889	2.1578
																		890	1.9267	890	2.1189	890	2.0144
																		891	1.8384	891	2.0374	891	1.9151
																		892	1.6229	892	1.9777	892	1.6588
																		893	1.4455	893	1.8753	893	1.6058
																		894	1.2052	894	1.6838	894	1.4453
																		895	0.9753	895	1.401	895	1.0422
																		896	0.9258	896	1.2112	896	1.0236
																		897	1.2252	897	1.445	897	1.5496
																		898	1.5489	898	1.7963	898	1.8838
																		899	1.7895	899	2.2093	899	2.0833
																		900	1.9935	900	2.6839	900	2.2016
																		901	2.0605	901	3.0539	901	2.1209
																		902	1.9046	902	3.2528	902	2.1102
																		903	1.6452	903	2.6558	903	1.8888
																		904	1.4012	904	2.4151	904	1.576
																		905	1.0909	905	1.9276	905	1.0921
																		906	0.9143	906	1.0765	906	0.9293
																		907	1.0595	907	1.3105	907	1.0704
																		908	1.5444	908	1.9598	908	1.4922
																		909	1.9742	909	2.2466	909	1.8974
																		910	2.147	910	2.2889	910	2.1068
																		911	2.0485	911	2.2787	911	2.0886
																		912	2.003	912	1.9917	912	2.0132
																		913	1.916	913	1.8174	913	1.9233
																		914	1.7321	914	1.6571	914	1.4868
																		915	1.4381	915	1.2966	915	1.203
																		916	1.2432	916	1.0751	916	1.0763
																		917	1.4024	917	1.2919	917	1.2584
																		918	1.7453	918	1.7225	918	1.7059
																		919	2.1201	919	2.1267	919	2.1588
																		920	2.3886	920	2.3583	920	2.3384
																		921	2.5615	921	2.3854	921	2.2997
																		922	2.3139	922	2.2112	922	2.0094
																		923	2.1384	923	2.0661	923	1.8836
																		924	1.8017	924	1.6711	924	1.5416
																		925	1.4744	925	1.2681	925	1.2071
																		926	1.3058	926	1.1915	926	1.1457
																		927	1.5232	927	1.413	927	1.4204
																		928	1.7921	928	1.651	928	1.7741
																		929	2.0743	929	1.9731	929	2.0336
																		930	2.227	930	2.0726	930	2.2734
																		931	2.208	931	1.9588	931	2.1994
																		932	2.0377	932	1.8172	932	2.1049
																		933	1.7669	933	1.6567	933	1.8332
																		934	1.5669	934	1.4703	934	1.5979
																		935	1.2818	935	1.2159	935	1.2879
																		936	0.9359	936	1.0317	936	0.9868
																		937	0.8816	937	1.0109	937	0.9343
																		938	1.3261	938	1.5213	938	1.4135
																		939	1.6983	939	1.8597	939	1.7363
																		940	1.865	940	2.0369	940	1.9853
																		941	1.9777	941	2.1217	941	2.1104
																		942	1.9737	942	2.0534	942	2.0553
																		943	1.8613	943	1.8602	943	2.0598
																		944	1.7657	944	1.713	944	1.8291
																		945	1.4403	945	1.3625	945	1.4993
																		946	1.0878	946	1.2353	946	1.2534
																		947	1.1801	947	1.4196	947	1.4339
																		948	1.6253	948	1.8412	948	1.9461
																		949	2.0087	949	2.2013	949	2.399
																		950	2.1245	950	2.3537	950	2.5692
																		951	2.105	951	2.36	951	2.5775
																		952	2.116	952	2.3845	952	2.5305
																		953	1.9188	953	2.0045	953	2.3103
																		954	1.5588	954	1.6652	954	2.012
																		955	1.1765	955	1.3379	955	1.6516
																		956	0.9734	956	1.2265	956	1.494
																		957	1.198	957	1.5176	957	1.7548
																		958	1.5485	958	1.9728	958	2.069
																		959	1.73	959	2.2904	959	2.2352
																		960	1.8902	960	2.4789	960	2.3151
																		961	1.9577	961	2.5636	961	2.3622
																		962	1.9498	962	2.5417	962	2.3209
																		963	1.8755	963	2.397	963	2.3058
																		964	1.6551	964	2.1038	964	1.9595
																		965	1.2792	965	1.6649	965	1.5105
																		966	1.054	966	1.4426	966	1.2792
																		967	1.2341	967	1.5453	967	1.5444
																		968	1.7508	968	1.9829	968	2.1566
																		969	2.1693	969	2.3656	969	2.6337
																		970	2.4303	970	2.5879	970	2.9046
																		971	2.3976	971	2.6741	971	2.959
																		972	2.1938	972	2.5977	972	2.8233
																		973	2.0212	973	2.34	973	2.4686
																		974	1.8092	974	2.1408	974	2.1074
																		975	1.5983	975	1.8214	975	1.6335
																		976	1.313	976	1.5357	976	1.3105
																		977	1.4537	977	1.6337	977	1.4167
																		978	2.0108	978	2.1704	978	1.9601
																		979	2.3991	979	2.5983	979	2.3423
																		980	2.5975	980	2.8709	980	2.6022
																		981	2.58	981	2.9634	981	2.7477
																		982	2.3287	982	2.8346	982	2.6306
																		983	2.0918	983	2.6433	983	2.4704
																		984	1.8523	984	2.2527	984	2.2242
																		985	1.6329	985	1.8394	985	1.9822
																		986	1.7592	986	1.9032	986	1.9276
																		987	2.8141	987	2.9904	987	3.0042
																		988	2.5037	988	2.6336	988	2.6072
																		989	2.1477	989	2.2216	989	2.1911
																		990	1.7046	990	1.769	990	1.7574
																		991	1.3851	991	1.5158	991	1.52
																		992	1.4645	992	1.751	992	1.6807
																		993	1.8781	993	2.2713	993	2.1239
																		994	2.3146	994	2.7605	994	2.5184
																		995	2.5694	995	2.9296	995	2.5951
																		996	2.65	996	2.8958	996	2.5883
																		997	2.4109	997	2.7475	997	2.482
																		998	2.2493	998	2.5268	998	2.298
																		999	1.9255	999	2.1134	999	2.2164
																		1000	1.5052	1000	1.6727	1000	1.8259
																		1001	1.2781	1001	1.4758	1001	1.3712
																		1002	1.3787	1002	1.5825	1002	1.4721
																		1003	1.8191	1003	1.9844	1003	2.0418
																		1004	2.1732	1004	2.3429	1004	2.5169
																		1005	2.2928	1005	2.4775	1005	2.7498
																		1006	2.2184	1006	2.4939	1006	2.9039
																		1007	2.0565	1007	2.4528	1007	2.8209
																		1008	1.7657	1008	2.2386	1008	2.5107
																		1009	1.3921	1009	1.9057	1009	2.0033
																		1010	1.1008	1010	1.6272	1010	1.5682
																		1011	1.007	1011	1.4779	1011	1.305
																		1012	1.2417	1012	1.6501	1012	1.4495
																		1013	1.4958	1013	1.8992	1013	1.7788
																		1014	1.779	1014	2.2043	1014	2.0983
																		1015	2.0196	1015	2.466	1015	2.3723
																		1016	2.1565	1016	2.584	1016	2.5678
																		1017	2.0352	1017	2.2986	1017	2.5033
																		1018	1.9603	1018	1.9738	1018	2.3121
																		1019	1.5597	1019	1.7964	1019	2.1679
																		1020	1.1831	1020	1.4528	1020	1.6991
																		1021	0.9937	1021	1.2315	1021	1.4756
																		1022	1.0994	1022	1.2642	1022	1.5708
																		1023	1.5646	1023	1.6942	1023	1.9798
																		1024	1.9716	1024	2.0732	1024	2.3686
																		1025	2.1206	1025	2.2603	1025	2.5311
																		1026	2.1057	1026	2.3266	1026	2.5213
																		1027	2.0659	1027	2.2175	1027	2.3573
																		1028	1.8149	1028	1.9816	1028	2.0207
																		1029	1.6099	1029	1.6996	1029	1.6542
																		1030	1.2882	1030	1.356	1030	1.2607
																		1031	1.0049	1031	1.1192	1031	1.0533
																		1032	1.1642	1032	1.231	1032	1.2046
																		1033	1.5144	1033	1.5498	1033	1.5389
																		1034	1.7511	1034	1.8241	1034	1.8078
																		1035	1.8336	1035	1.9325	1035	1.8914
																		1036	1.8887	1036	2.0144	1036	2.0082
																		1037	1.8486	1037	1.9406	1037	2.0187
																		1038	1.7881	1038	1.7556	1038	1.7406
																		1039	1.4728	1039	1.337	1039	1.3689
																		1040	0.9989	1040	1.0063	1040	1.0175
																		1041	1.0396	1041	1.0392	1041	1.0439
																		1042	1.3513	1042	1.3629	1042	1.4165
																		1043	1.7486	1043	1.726	1043	1.8099
																		1044	2.0348	1044	1.9956	1044	2.0847
																		1045	2.1836	1045	2.108	1045	2.1753
																		1046	2.2937	1046	2.1144	1046	2.2325
																		1047	2.2406	1047	2.1456	1047	2.2437
																		1048	2.1033	1048	2.0388	1048	2.0229
																		1049	1.8402	1049	1.7137	1049	1.6611
																		1050	1.5476	1050	1.4121	1050	1.3349
																		1051	1.4546	1051	1.1771	1051	1.1694
																		1052	1.7541	1052	1.3545	1052	1.2538
																		1053	2.0953	1053	1.8056	1053	1.7198
																		1054	2.2633	1054	2.0958	1054	2.0595
																		1055	2.3647	1055	2.2286	1055	2.2743
																		1056	2.4169	1056	2.2609	1056	2.4201
																		1057	2.2096	1057	2.149	1057	2.1742
																		1058	1.8762	1058	1.8864	1058	1.7509
																		1059	1.6239	1059	1.6896	1059	1.446
																		1060	1.3254	1060	1.3594	1060	1.2229
																		1061	1.1368	1061	1.0618	1061	1.1479
																		1062	1.2333	1062	1.0995	1062	1.1931
																		1063	1.6271	1063	1.581	1063	1.5565
																		1064	1.9141	1064	2.0197	1064	1.8385
																		1065	2.0036	1065	2.4072	1065	1.906
																		1066	2.1019	1066	3.0011	1066	1.9719
																		1067	2.0467	1067	3.1389	1067	1.9512
																		1068	1.674	1068	2.6186	1068	1.6285
																		1069	1.3858	1069	2.2212	1069	1.4734
																		1070	1.1035	1070	1.6002	1070	1.215
																		1071	0.9843	1071	1.4827	1071	0.9865
																		1072	1.2007	1072	2.0053	1072	1.2517
																		1073	1.5632	1073	2.3721	1073	1.6341
																		1074	1.7811	1074	2.5738	1074	1.938
																		1075	1.8575	1075	2.6316	1075	2.1323
																		1076	1.9069	1076	2.5608	1076	2.2286
																		1077	1.8102	1077	2.2821	1077	2.1051
																		1078	1.6047	1078	1.9568	1078	1.9991
																		1079	1.3771	1079	1.6155	1079	1.7122
																		1080	1.107	1080	1.2613	1080	1.301
																		1081	0.9494	1081	1.1037	1081	0.9356
																		1082	1.0694	1082	1.3602	1082	0.9814
																		1083	1.4366	1083	1.918	1083	1.4352
																		1084	1.7512	1084	2.3477	1084	1.9934
																		1085	1.9617	1085	2.3927	1085	2.0562
																		1086	2.109	1086	2.1991	1086	2.0885
																		1087	2.0479	1087	1.8501	1087	2.1016
																		1088	1.8853	1088	1.761	1088	2.035
																		1089	1.662	1089	1.6096	1089	1.8942
																		1090	1.3197	1090	1.3947	1090	1.6242
																		1091	1.0406	1091	1.3645	1091	1.2394
																		1092	1.2109	1092	1.7807	1092	1.3594
																		1093	1.6446	1093	2.15	1093	1.6928
																		1094	1.9789	1094	2.3946	1094	1.9293
																		1095	2.0627	1095	2.5746	1095	2.0321
																		1096	2.0293	1096	2.6261	1096	2.018
																		1097	1.9131	1097	2.5362	1097	1.9144
																		1098	1.7151	1098	2.3373	1098	1.677
																		1099	1.4151	1099	2.0118	1099	1.3866
																		1100	1.1399	1100	1.7167	1100	1.1643
																		1101	1.0318	1101	1.6251	1101	1.1103
																		1102	1.2585	1102	1.8254	1102	1.3012
																		1103	1.5263	1103	2.0842	1103	1.554
																		1104	1.8228	1104	2.3541	1104	1.7676
																		1105	2.0262	1105	2.5205	1105	2.0063
																		1106	2.1513	1106	2.5412	1106	2.0978
																		1107	2.0275	1107	2.4558	1107	1.9131
																		1108	1.9092	1108	2.2287	1108	1.5893
																		1109	1.5888	1109	1.8011	1109	1.3808
																		1110	1.168	1110	1.2848	1110	1.0742
																		1111	0.9238	1111	0.9606	1111	0.9109
																		1112	0.9665	1112	1.0426	1112	0.9998
																		1113	1.3162	1113	1.3904	1113	1.4131
																		1114	1.7152	1114	1.738	1114	1.7852
																		1115	1.9459	1115	1.9265	1115	1.9342
																		1116	1.9999	1116	2.0141	1116	1.8961
																		1117	1.9434	1117	1.8841	1117	1.8004
																		1118	1.7333	1118	1.6532	1118	1.5143
																		1119	1.5427	1119	1.4694	1119	1.3234
																		1120	1.3107	1120	1.1926	1120	1.1441
																		1121	1.1954	1121	1.0067	1121	1.0088
																		1122	1.3432	1122	1.2081	1122	1.1362
																		1123	1.7203	1123	1.653	1123	1.4602
																		1124	2.078	1124	2.0519	1124	1.7395
																		1125	2.2681	1125	2.3189	1125	1.8616
																		1126	2.3859	1126	2.4819	1126	1.978
																		1127	2.4832	1127	2.4336	1127	2.0351
																		1128	2.139	1128	2.3848	1128	1.824
																		1129	2.0198	1129	1.8614	1129	1.4503
																		1130	1.4303	1130	1.4247	1130	1.1084
																		1131	1.4113	1131	1.3359	1131	1.133
																		1132	1.7338	1132	1.7001	1132	1.5001
																		1133	2.0445	1133	2.1215	1133	1.9446
																		1134	2.2906	1134	2.3809	1134	2.1702
																		1135	2.362	1135	2.4741	1135	2.3216
																		1136	2.3586	1136	2.5147	1136	2.3935
																		1137	2.2736	1137	2.4138	1137	2.2676
																		1138	2.1293	1138	2.2671	1138	2.0383
																		1139	1.8955	1139	1.831	1139	1.7118
																		1140	1.6084	1140	1.4518	1140	1.4086
																		1141	1.436	1141	1.2155	1141	1.1335
																		1142	1.6435	1142	1.2069	1142	1.3028
																		1143	2.3014	1143	1.743	1143	1.8125
																		1144	2.9028	1144	2.2097	1144	2.2262
																		1145	3.359	1145	2.4933	1145	2.5003
																		1146	3.5429	1146	2.5253	1146	2.6026
																		1147	3.4259	1147	2.3089	1147	2.4451
																		1148	3.0555	1148	1.9529	1148	2.1351
																		1149	2.6204	1149	1.7	1149	1.8597
																		1150	2.1924	1150	1.4373	1150	1.559
																		1151	1.9989	1151	1.268	1151	1.3622
																		1152	2.2171	1152	1.4003	1152	1.4945
																		1153	2.7021	1153	1.8807	1153	2.0994
																		1154	3.0424	1154	2.2925	1154	2.6311
																		1155	3.263	1155	2.5895	1155	2.9787
																		1156	3.3842	1156	2.8444	1156	3.3181
																		1157	3.1619	1157	2.9552	1157	3.3617
																		1158	2.7498	1158	2.799	1158	3.3724
																		1159	2.4056	1159	2.6415	1159	2.9352
																		1160	2.0662	1160	2.2538	1160	2.2294
																		1161	2.0862	1161	2.0735	1161	1.9898
																		1162	2.7691	1162	2.6856	1162	2.7722
																		1163	3.6229	1163	3.684	1163	3.6942
																		1164	4.3076	1164	4.5424	1164	4.3886
