# Supplementary material for: Archaeal chromatin ‘slinkies’ are inherently dynamic complexes with deflected DNA wrapping pathways
Source: eLife. 2021 Mar 2;10:e65587. doi: 10.7554/eLife.65587 (PMC7990501; doi:10.7554/eLife.65587)
Supplement: Figure 5—source data 1. [file elife-65587-fig5-data1.csv]

PanelA
Arc207_0mM_MgCl2		Arc207_1mM_MgCl2		Arc207_2mM_MgCl2		Arc207_5mM_MgCl2		Arc207_7mM_MgCl2		Arc207_8mM_MgCl2		Arc207_10mM_MgCl2		Nuc147_0mM_MgCl2		Nuc147_1mM_MgCl2		Nuc147_2mM_MgCl2
S	BF	S	BF	S	BF	S	BF	S	BF	S	BF	S	BF	S	BF	S	BF	S	BF
10.74827	6.8	11.48594	6.8	11.67266	6.8	12.57518	6.8	12.38889	6.8	12.59508	6.8	12.53247	6.8	10.09508	6.8	10.1062	6.8	10.61559	6.8
10.71749	10.4	11.36792	10.4	11.52173	10.4	12.39562	10.4	12.60506	10.4	12.67054	10.4	12.61935	10.4	10.75788	10.4	10.82338	10.4	10.91353	10.4
10.70983	14	11.31124	14	11.58089	14	12.61231	14	12.59097	14	12.6465	14	12.57198	14	10.90889	14	11.01585	14	10.98619	14
10.62796	17.6	11.32803	17.6	11.62501	17.6	12.54623	17.6	12.51588	17.6	12.62459	17.6	12.71626	17.6	10.9652	17.6	11.15868	17.6	11.10913	17.6
10.57943	21.2	11.43863	21.2	11.53091	21.2	12.59862	21.2	12.64109	21.2	12.54535	21.2	12.60592	21.2	10.9852	21.2	11.17578	21.2	11.07424	21.2
10.59501	24.8	11.44635	24.8	11.63315	24.8	12.59081	24.8	12.61904	24.8	12.59835	24.8	12.79088	24.8	11.06155	24.8	11.22082	24.8	11.12147	24.8
10.59726	28.4	11.43176	28.4	11.67658	28.4	12.56261	28.4	12.72266	28.4	12.71421	28.4	12.71188	28.4	11.11041	28.4	11.34371	28.4	11.20063	28.4
10.58744	32	11.44331	32	11.64	32	12.48437	32	12.6195	32	12.58846	32	12.68755	32	11.09621	32	11.2622	32	11.15237	32
10.59107	35.6	11.54389	35.6	11.56406	35.6	12.51321	35.6	12.58693	35.6	12.50812	35.6	12.59521	35.6	11.12846	35.6	11.32155	35.6	11.23271	35.6
10.58108	39.2	11.57935	39.2	11.58607	39.2	12.53022	39.2	12.58582	39.2	12.50705	39.2	12.6105	39.2	11.09124	39.2	11.31195	39.2	11.2539	39.2
10.60115	42.8	11.57617	42.8	11.62461	42.8	12.58908	42.8	12.68834	42.8	12.51979	42.8	12.58588	42.8	11.1903	42.8	11.32736	42.8	11.21228	42.8
10.59554	46.4	11.52802	46.4	11.69016	46.4	12.45218	46.4	12.64407	46.4	12.55327	46.4	12.64418	46.4	11.13788	46.4	11.28918	46.4	11.26414	46.4
10.61767	50	11.5107	50	11.66416	50	12.49127	50	12.70667	50	12.54432	50	12.59688	50	11.12969	50	11.34806	50	11.26162	50
10.71569	53.6	11.58728	53.6	11.67682	53.6	12.50638	53.6	12.65463	53.6	12.55051	53.6	12.59193	53.6	11.16748	53.6	11.34658	53.6	11.29467	53.6
10.72422	57.2	11.54053	57.2	11.70386	57.2	12.4835	57.2	12.74802	57.2	12.54971	57.2	12.6352	57.2	11.19548	57.2	11.33138	57.2	11.27556	57.2
10.617	60.8	11.51565	60.8	11.68243	60.8	12.57996	60.8	12.70568	60.8	12.5607	60.8	12.64766	60.8	11.22565	60.8	11.35116	60.8	11.35102	60.8
10.65474	64.4	11.41394	64.4	11.63811	64.4	12.50612	64.4	12.70125	64.4	12.6798	64.4	12.66792	64.4	11.12813	64.4	11.33868	64.4	11.38858	64.4
10.6973	68	11.42842	68	11.70848	68	12.38879	68	12.65354	68	12.60746	68	12.72497	68	11.17731	68	11.36689	68	11.32859	68
10.61729	71.6	11.43015	71.6	11.76729	71.6	12.49501	71.6	12.65465	71.6	12.52597	71.6	12.6308	71.6	11.19778	71.6	11.3383	71.6	11.38985	71.6
10.6936	75.2	11.44774	75.2	11.72706	75.2	12.54429	75.2	12.76496	75.2	12.54394	75.2	12.69934	75.2	11.23985	75.2	11.35517	75.2	11.42901	75.2
10.65823	78.8	11.48749	78.8	11.78344	78.8	12.5594	78.8	12.83378	78.8	12.66675	78.8	12.67612	78.8	11.27929	78.8	11.3675	78.8	11.43792	78.8
10.8177	82.4	11.616	82.4	11.88421	82.4	12.47763	82.4	12.66013	82.4	12.61929	82.4	12.64859	82.4	11.38056	82.4	11.37094	82.4	11.45829	82.4
10.82986	86	11.58809	86	11.82583	86	12.64829	86	12.87529	86	12.7423	86	12.53255	86	11.37449	86	11.3362	86	11.49954	86
10.95	89.6	11.66238	89.6	12.10932	89.6	12.46775	89.6	12.8033	89.6	12.89603	89.6	12.70541	89.6	11.3364	89.6	11.40229	89.6	11.52488	89.6
11.30225	93.2	11.67669	93.2	12.18269	93.2	12.55879	93.2	12.72625	93.2	12.98667	93.2	12.72439	93.2	11.56898	93.2	11.48906	93.2	11.66308	93.2
PanelB
Arc207
[MgCl2]	f/f0	f/f0(CI,95%lower)	f/f0(CI,95%upper)	OD260
0	1.94	1.89	1.99	1.04
1	1.82	1.78	1.86	0.89
2	1.78	1.72	1.82	0.94
5	1.54	1.54	1.54	0.95
7	1.55	1.5	1.6	0.9
8	1.52	1.37	1.68	0.96
10	1.53	1.52	1.54	0.97
Nuc147
[MgCl2]	f/f0	f/f0(CI,95%lower)	f/f0(CI,95%upper)	OD260
0	1.55	1.49	1.61	0.99
1	1.46	1.37	1.55	0.7
2	1.46	1.43	1.49	0.62
