# Supplementary figures and images for: Archaeal chromatin ‘slinkies’ are inherently dynamic complexes with deflected DNA wrapping pathways
Source: eLife journal article supplement (doi:10.7554/elife.65587), 2021-03-01

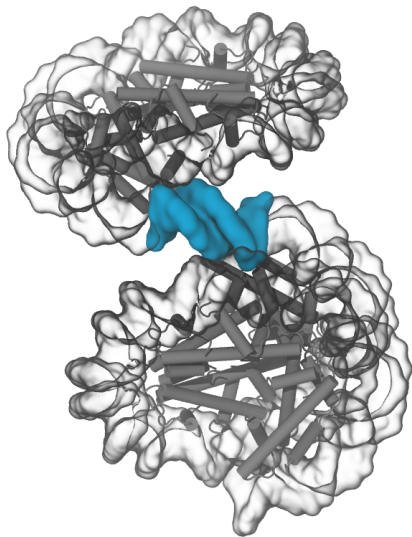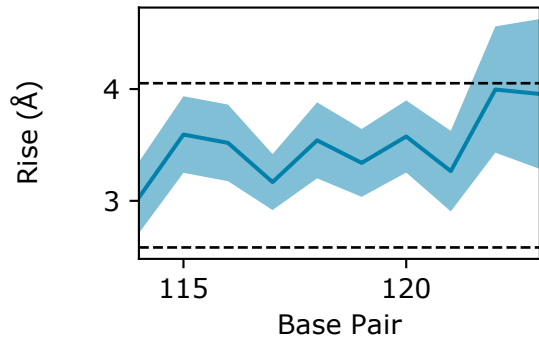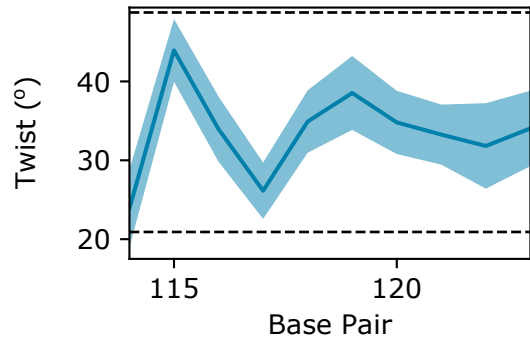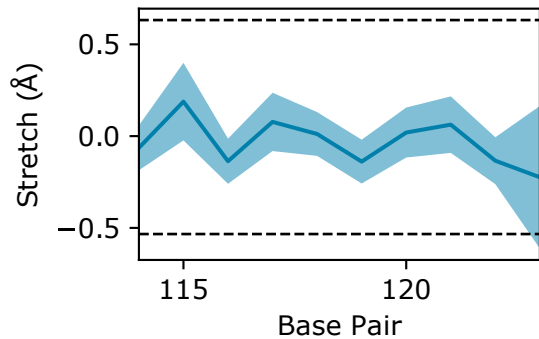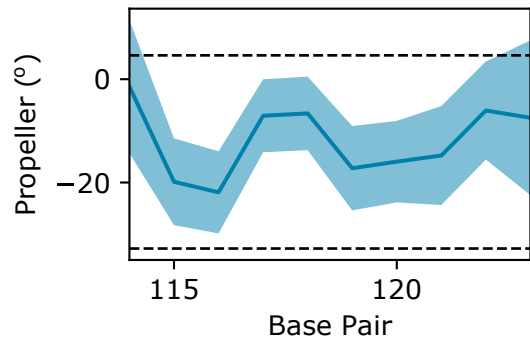

Supplement: supp [file elife-65587-supp-v1.zip]

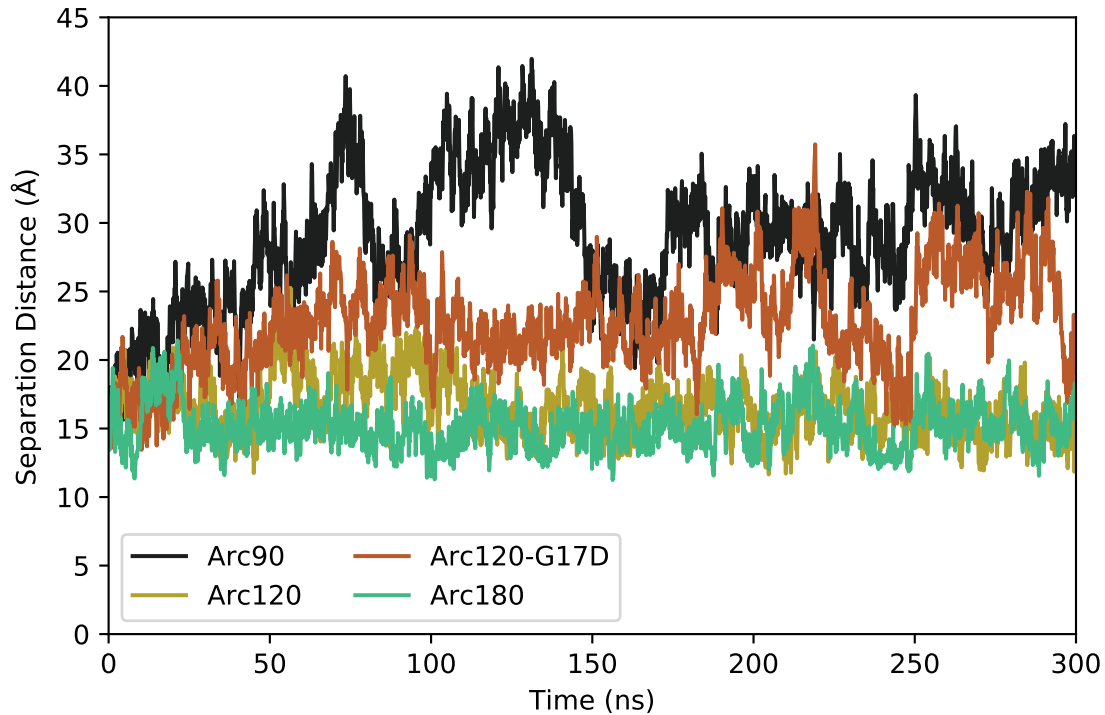

Supplement: supp [file elife-65587-supp-v1.zip]

5' strand

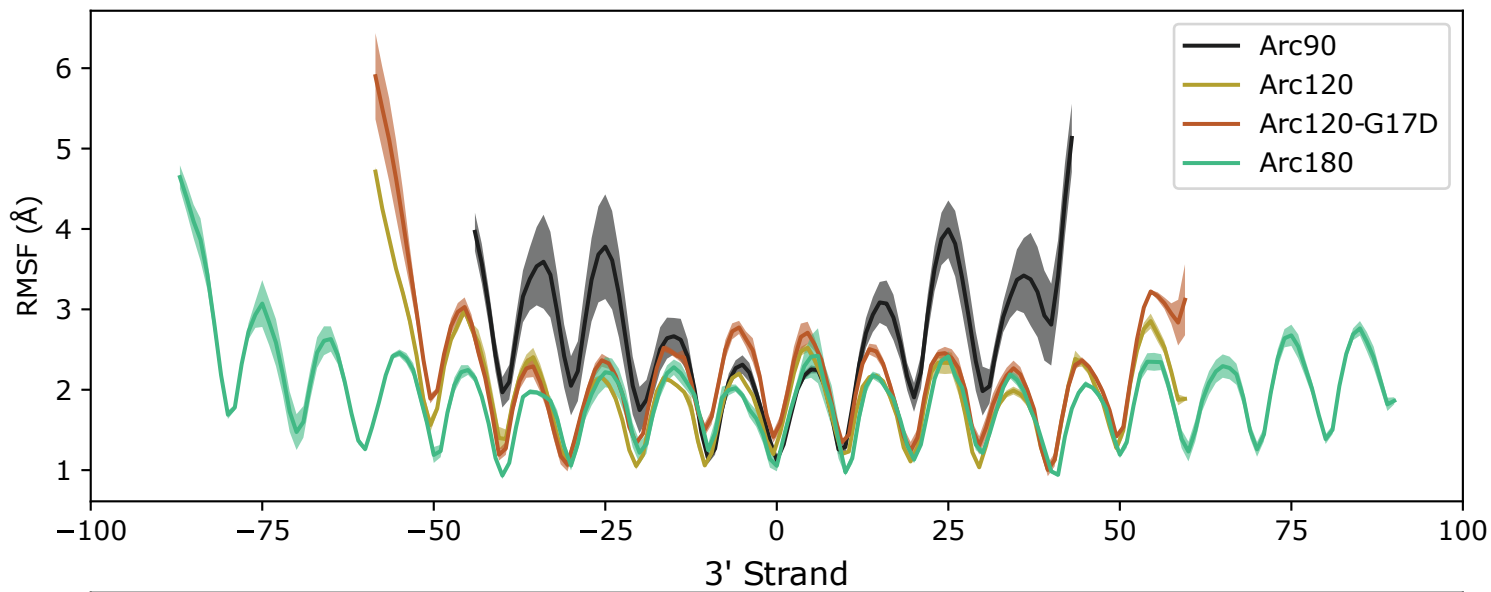

3' Strand

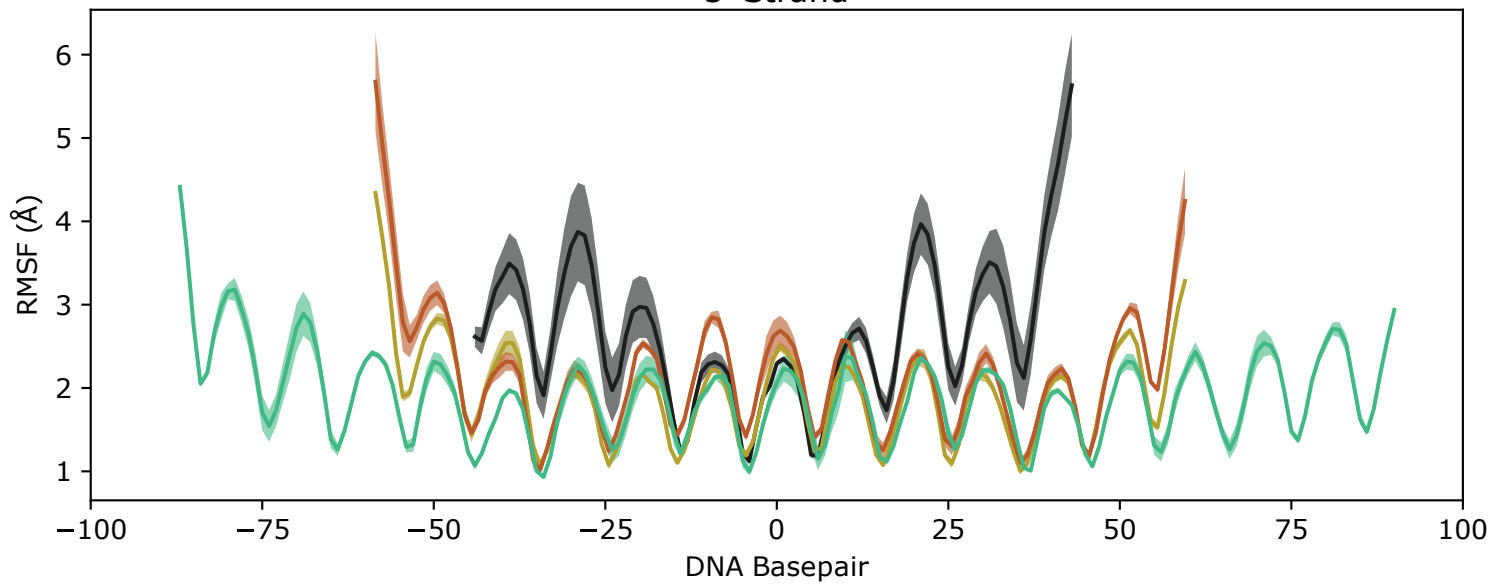

Supplement: supp [file elife-65587-supp-v1.zip]

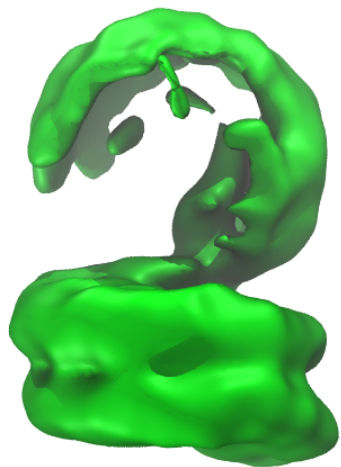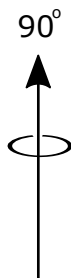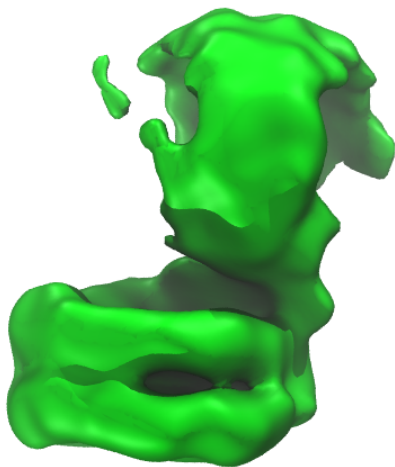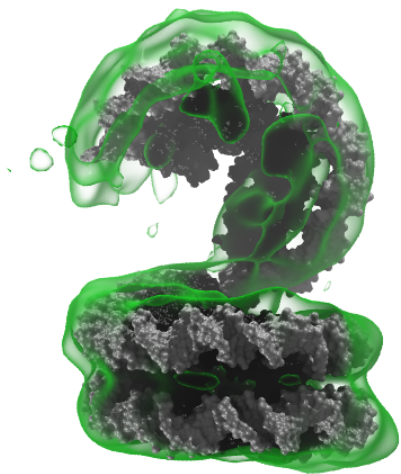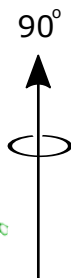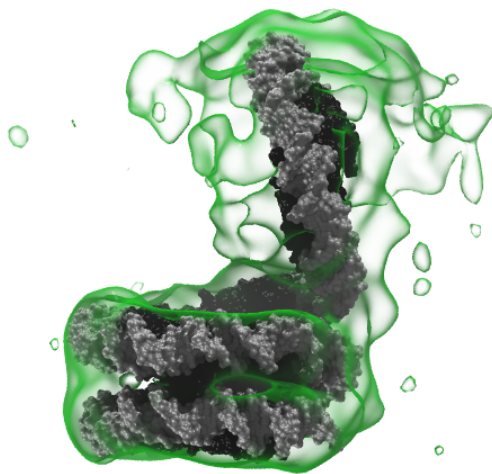

Supplement: supp [file elife-65587-supp-v1.zip]

207 bp  
DNA

+ HTkA

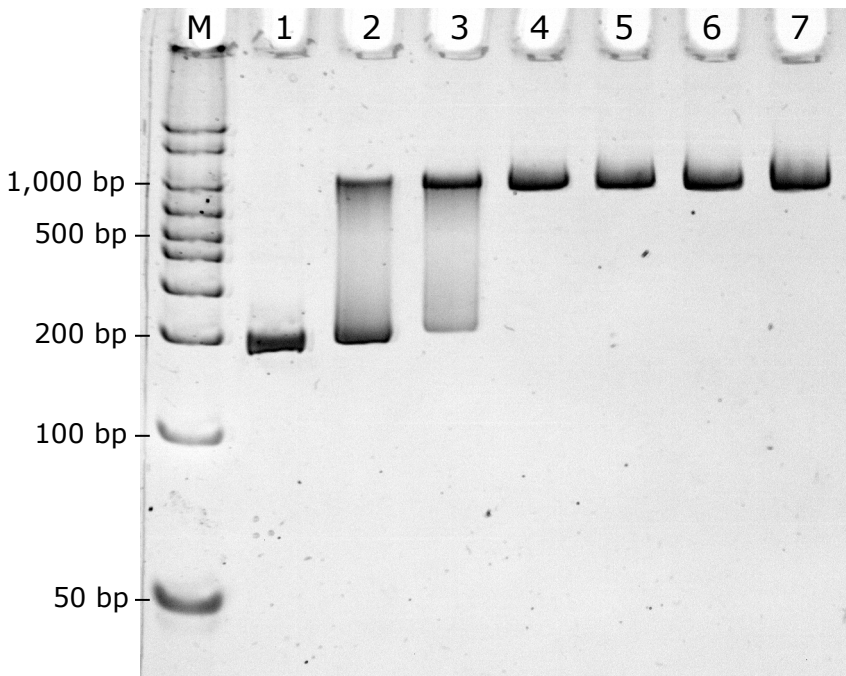

Supplement: supp [file elife-65587-supp-v1.zip]
